# Supplementary material
Source: PubMed Central journal article supplement (PMC2515612)
Supplement: NIHMS58419-supplement-supplemental.pdf [file NIHMS58419-supplement-supplemental.pdf]

**Note 1:****Statistical Analysis of Array Data:**

The experimental design consisted of four treatments with four replications per treatment, for a total of sixteen chips. The treatment categories were untreated wild type (Wt), untreated *pk1* mutant (Pk1), uniconazole-P treated wild type (Uwt) and uniconazole-P treated *pk1* mutant (Upkl). The Affymetrix® analysis reported two values for each gene: the average difference call and the absolute analysis or presence/absence call (Affymetrix Microarray Suite v. 4.0).

Differences in gene expression were evaluated in paired comparisons (Pk1 vs. Wt and Upkl vs. Uwt). A *t*-test was generated for each gene pair using the Cyber-T (Long et al., 2001) web interface (<http://genex.ncgr.org/genex/cybert>). Probability values were generated with and without the Bonferroni correction for multiple comparisons. For the Bonferroni correction, the experiment-wide false positive rate (the probability of declaring an expression difference significant by chance alone) was set at 0.25. The set of genes examined in this paper occurred in the intersection of all of those genes that met criteria  $p < 0.05$  without the Bonferroni correction for the two comparisons (Pk1 vs. Wt  $p < 0.05$  □ Upkl vs. Uwt  $p < 0.05$ ). 293 genes in total met these selection criteria. Those genes for which the corresponding transcript level is elevated two-fold or more in *pk1* seeds in both the absence and presence of uniconazole-P are listed in Table 1a (56 in total). The remaining 237 genes are listed in Table 1b. In addition, we include here the list of genes that occur in the intersection of all of those genes that met criteria  $p < 0.05$  without the Bonferroni correction for the two comparisons (Pk1 vs. Upkl  $p < 0.05$  □ Wt vs. Uwt  $p < 0.05$ ) in Table 2, and the list of genes that occur in the intersection of all of those genes that met criteria  $p < 0.05$  without the Bonferroni correction for the three comparisons (Wt vs. Upkl  $p < 0.05$  □ Pk1 vs. Upkl  $p < 0.05$  □ Uwt vs. Upkl  $p < 0.05$ ) in Table 3.

**Note 2:****Supplementary information for qRT-PCR:**

Oligonucleotide primer sequences and primer concentrations used for qRT-PCR are available in Table 4. Relative expression values of genes were calculated from critical threshold values as described in ABI User Bulletin #2, part # 4303859B available at [http://docs.appliedbiosystems.com/search.taf?\\_UserReference=6E00E667F6CFB2C43DE24701](http://docs.appliedbiosystems.com/search.taf?_UserReference=6E00E667F6CFB2C43DE24701). Tables 5 through 10 list the critical threshold values for Figures 1, 3, 4, 5, 6, and 7 respectively from the manuscript.

**Long, A.D., Mangalam, H.J., Chan, B.Y., Toller, L., Hatfield, G.W. and Baldi, P.** (2001) Improved statistical inference from DNA microarray data using analysis of variance and a Bayesian statistical framework. Analysis of global gene expression in *Escherichia coli* K12. *J Biol Chem* **276**, 19937-19944.

Table 1a. Genes that exhibit *PKL*-dependent transcription based on the criteria (*Pkl* vs. *Wt*  $p < 0.05$  □ *Upkl* vs. *Uwt*  $p < 0.05$ ) and for which the corresponding transcript level is elevated two-fold or more in *pkl* seeds in both the absence and presence of uniconazole-P.

Wt=Wild type, Pkl=*pickle* mutant, Uwt=uniconazole-P treated wild type, Upkl= uniconazole-P treated *pickle* mutant; Mean= mean value for a given treatment, SD= standard deviation of the mean for a given treatment  
Putative identification and Class represent a manual annotation based on computer derived Gene ontologies available at TAIR in conjunction with BLAST results from the non-redundant GenBank protein database  
Class designations are analogous to those presented by White et. al. 2000, Plant Physiology 124 :1582-1594; Data is sorted by the ratio of Pkl/Wt; This data set contains 56 genes

| Affy Code  | AGI Code  | Pkl Mean | Pkl SD | Wt Mean | Wt SD | Pkl/Wt | Upkl Mean | Upkl SD | Uwt Mean | Uwt SD | Upkl/Uwt | Class | Putative Identification/Function               | Potential Role in Embryos | Citation                    |
|------------|-----------|----------|--------|---------|-------|--------|-----------|---------|----------|--------|----------|-------|------------------------------------------------|---------------------------|-----------------------------|
| 13276_at   | \NULL     | 480      | 89     | 33      | 111   | 14.75  | 352       | 135     | 20       | 66     | 17.84    | UF    | \NULL                                          |                           |                             |
| 12902_at   | At3g54180 | 304      | 59     | 30      | 161   | 10.13  | 293       | 69      | 19       | 84     | 15.61    | CDC   | cdc2b/cell cycle control                       |                           |                             |
| 14550_at   | At4g23690 | 213      | 53     | 27      | 67    | 7.90   | 225       | 89      | 69       | 75     | 3.25     | D     | disease response                               |                           |                             |
| 15996_at   | At3g16430 | 2586     | 485    | 357     | 1395  | 7.25   | 3489      | 128     | 381      | 989    | 9.17     | D     | jasmonate inducible isolog                     | Defense                   | Plant Physiology 103:703    |
| 15357_at   | At4g33560 | 2712     | 185    | 401     | 1655  | 6.77   | 2285      | 178     | 342      | 335    | 6.69     | UF    | unknown                                        |                           |                             |
| 18464_at   | At2g43480 | 168      | 44     | 27      | 48    | 6.33   | 165       | 70      | 53       | 30     | 3.14     | OX    | Ascorbate peroxidase                           |                           |                             |
| 12763_s_at | At2g05520 | 512      | 90     | 89      | 298   | 5.75   | 402       | 163     | 22       | 137    | 18.71    | D     | atGRP3/cell wall, signaling                    | Somatic embryogenesis     | Plant Mol Biol 28:39        |
| 13278_f_at | At5g12030 | 630      | 223    | 137     | 140   | 4.62   | 491       | 56      | 20       | 26     | 25.19    | CHP   | HSP17.6A/heat shock protein                    | Dessiccation              | Plant Physiology 122:1099   |
| 16014_at   | At1g75750 | 1730     | 236    | 377     | 873   | 4.59   | 2050      | 188     | 311      | 609    | 6.59     | UF    | GASA1/gibberellin response                     | maturation                | Plant Mol Biol 36:871       |
| 14383_at   | At1g09460 | 322      | 158    | 82      | 63    | 3.93   | 446       | 188     | 85       | 48     | 5.27     | CW    | glucanase                                      |                           |                             |
| 16238_at   | At4g16480 | 562      | 164    | 162     | 133   | 3.48   | 745       | 203     | 107      | 94     | 6.96     | MT    | sugar transporter                              |                           |                             |
| 20438_at   | At1g10370 | 1217     | 218    | 361     | 563   | 3.38   | 1386      | 157     | 320      | 123    | 4.33     | OX    | GST 30                                         |                           |                             |
| 12151_at   | At2g43150 | 10084    | 3613   | 3057    | 4262  | 3.30   | 10809     | 851     | 1554     | 1763   | 6.96     | CW    | putative extensin                              |                           |                             |
| 17909_at   | At1g62480 | 2029     | 522    | 625     | 583   | 3.25   | 1935      | 170     | 676      | 186    | 2.86     | UF    | unknown                                        |                           |                             |
| 15971_s_at | At3g16410 | 13774    | 2954   | 4335    | 4451  | 3.18   | 16642     | 1052    | 3949     | 905    | 4.21     | D     | lectin/myrosinase binding                      | Defense                   | Plant Physiology 103:703    |
| 13277_i_at | \NULL     | 3589     | 1146   | 1165    | 1019  | 3.08   | 3050      | 316     | 660      | 350    | 4.62     | UF    | \NULL                                          |                           |                             |
| 16487_at   | At2g25450 | 482      | 170    | 160     | 78    | 3.02   | 462       | 135     | 216      | 74     | 2.14     | UF    | dioxigenase                                    |                           |                             |
| 13275_f_at | At3g46230 | 1163     | 380    | 385     | 342   | 3.02   | 857       | 49      | 157      | 157    | 5.45     | CHP   | HSP                                            | Dessiccation              | Plant Physiology 122:1099   |
| 17413_s_at | At5g64120 | 1896     | 284    | 630     | 773   | 3.01   | 2847      | 382     | 489      | 1112   | 5.82     | OX    | Ascorbate peroxidase                           |                           |                             |
| 12781_at   | At1g13930 | 968      | 227    | 337     | 228   | 2.87   | 1730      | 228     | 349      | 685    | 4.96     | UF    | unknown                                        |                           |                             |
| 13438_at   | At4g08685 | 2249     | 427    | 812     | 1002  | 2.77   | 1776      | 35      | 754      | 132    | 2.36     | L     | pollen allergen-related/unknown                |                           |                             |
| 12349_s_at | At2g37040 | 1338     | 221    | 492     | 541   | 2.72   | 1936      | 168     | 421      | 343    | 4.60     | SEM   | PAL1                                           |                           |                             |
| 20060_at   | At1g10370 | 1837     | 350    | 695     | 847   | 2.64   | 2134      | 155     | 708      | 365    | 3.01     | OX    | GST 30                                         |                           |                             |
| 13880_s_at | At4g25900 | 810      | 197    | 313     | 272   | 2.59   | 791       | 88      | 256      | 190    | 3.10     | C     | Apospory related/carbohydrate metabol.         | Somatic embryogenesis     | Proc XVII Grass Cong 2:1033 |
| 20097_at   | At1g65340 | 1302     | 296    | 510     | 477   | 2.55   | 1499      | 219     | 441      | 201    | 3.40     | OX    | CYP96A3                                        |                           |                             |
| 18663_s_at | At4g24130 | 921      | 334    | 365     | 283   | 2.53   | 948       | 85      | 255      | 130    | 3.72     | UF    | unknown                                        |                           |                             |
| 17003_at   | At2g39900 | 875      | 179    | 351     | 289   | 2.49   | 918       | 118     | 369      | 108    | 2.49     | T     | AtWLM2/transcription factor                    | Transcription             | This study                  |
| 14863_at   | At1g23750 | 769      | 136    | 309     | 301   | 2.49   | 1152      | 118     | 346      | 260    | 3.33     | UF    | unknown                                        |                           |                             |
| 17782_at   | At4g15480 | 616      | 183    | 249     | 46    | 2.48   | 627       | 115     | 278      | 101    | 2.26     | SEM   | UDP-glucosyl transferase                       |                           |                             |
| 15983_at   | At4g27140 | 2191     | 779    | 884     | 441   | 2.48   | 2989      | 134     | 370      | 311    | 8.08     | SP    | 2s1 albumin precursor                          | Storage Reserves          |                             |
| 20323_at   | At2g29500 | 393      | 96     | 162     | 120   | 2.43   | 303       | 103     | 68       | 95     | 4.49     | CHP   | HSP 20 alpha crystallin                        | Dessiccation              | Plant Physiology 122:1099   |
| 13680_at   | At1g55020 | 4941     | 1157   | 2055    | 2045  | 2.40   | 5126      | 577     | 1918     | 1027   | 2.67     | L     | lipoxigenase                                   |                           |                             |
| 19597_s_at | At4g17260 | 430      | 63     | 179     | 123   | 2.40   | 489       | 118     | 200      | 61     | 2.45     | C     | Lactate dehydrogenase LDH1                     |                           |                             |
| 14090_i_at | At2g15830 | 372      | 39     | 155     | 61    | 2.40   | 224       | 71      | 86       | 65     | 2.62     | UF    | unknown                                        |                           |                             |
| 15981_at   | At3g16420 | 30967    | 6321   | 12976   | 7081  | 2.39   | 39616     | 2439    | 16150    | 3365   | 2.45     | D     | Jacalin type lectin                            | Defense                   | Plant Physiology 103:703    |
| 18584_at   | At1g10970 | 2642     | 320    | 1126    | 799   | 2.35   | 2339      | 163     | 1095     | 523    | 2.14     | MT    | ZIP4 zinc transporter                          |                           |                             |
| 16893_at   | At4g31550 | 656      | 178    | 284     | 193   | 2.31   | 713       | 98      | 315      | 190    | 2.27     | T     | WRKY11/transcription factor                    |                           |                             |
| 20024_s_at | At2g35810 | 2727     | 362    | 1181    | 877   | 2.31   | 2653      | 201     | 1033     | 335    | 2.57     | UF    | unknown                                        |                           |                             |
| 16513_at   | At2g04780 | 3059     | 557    | 1330    | 793   | 2.30   | 2765      | 278     | 1105     | 212    | 2.50     | CW    | FLA7(arabinogalactan)/cell wall, signaling     | Somatic embryogenesis     | Phys Plant 114:637          |
| 19907_at   | At2g17320 | 390      | 131    | 172     | 115   | 2.26   | 442       | 129     | 157      | 27     | 2.82     | C     | panthothenate kinase                           |                           |                             |
| 15193_s_at | At2g30870 | 9046     | 1184   | 4012    | 3190  | 2.25   | 8628      | 628     | 3640     | 865    | 2.37     | OX    | ERD13/dehydration induced GST                  |                           |                             |
| 16031_at   | At5g01600 | 6218     | 1245   | 2768    | 2195  | 2.25   | 8266      | 658     | 2457     | 1673   | 3.36     | MT    | ATFER1/iron metabolism                         |                           |                             |
| 17771_at   | At1g26830 | 421      | 102    | 189     | 127   | 2.22   | 350       | 34      | 174      | 112    | 2.01     | CDC   | E3 ubiquitin ligase SCF complex subunit Cullin |                           |                             |
| 15868_at   | At2g22080 | 640      | 177    | 288     | 102   | 2.22   | 514       | 130     | 207      | 60     | 2.49     | UF    | En/Spm like transposon protein                 |                           |                             |
| 12587_at   | At2g22770 | 1881     | 134    | 850     | 785   | 2.21   | 1867      | 151     | 910      | 573    | 2.05     | T     | bHLH transcription factor                      |                           |                             |
| 20420_at   | At4g19810 | 1077     | 151    | 498     | 352   | 2.16   | 1477      | 122     | 465      | 263    | 3.18     | CW    | glycosyl hydrolase family 18                   |                           |                             |
| 19683_at   | At1g62500 | 654      | 85     | 303     | 110   | 2.16   | 1617      | 81      | 596      | 471    | 2.71     | CW    | proline rich cell wall protein                 |                           |                             |
| 19699_i_at | At4g23420 | 411      | 67     | 193     | 75    | 2.13   | 368       | 118     | 154      | 63     | 2.38     | C     | possible dehydrogenase                         |                           |                             |
| 14066_at   | At2g35880 | 718      | 186    | 341     | 108   | 2.11   | 659       | 83      | 320      | 131    | 2.06     | UF    | unknown                                        |                           |                             |
| 19998_at   | At2g30520 | 792      | 142    | 379     | 267   | 2.09   | 959       | 249     | 289      | 171    | 3.32     | STD   | RPT2/phototropism                              |                           |                             |
| 15633_s_at | At3g23000 | 287      | 3      | 140     | 60    | 2.06   | 282       | 62      | 103      | 93     | 2.74     | STD   | ATSRPK1/osmolarity stress                      |                           |                             |
| 13288_s_at | At5g11260 | 404      | 32     | 197     | 57    | 2.05   | 401       | 42      | 134      | 66     | 2.98     | T     | HY5/light response transcriptional control     |                           |                             |
| 20054_at   | At1g03420 | 1206     | 188    | 597     | 365   | 2.02   | 1234      | 230     | 559      | 105    | 2.21     | UF    | unknown                                        |                           |                             |
| 19490_at   | At1g10550 | 1423     | 336    | 705     | 226   | 2.02   | 1117      | 153     | 486      | 197    | 2.30     | C     | xyloglucan endotransglycosylase                |                           |                             |
| 17832_at   | At2g16060 | 4064     | 559    | 2032    | 1213  | 2.00   | 3212      | 389     | 1512     | 328    | 2.12     | OX    | HB1/hemoglobin                                 |                           |                             |
| 18929_s_at | At5g13930 | 31844    | 3707   | 15954   | 9363  | 2.00   | 38565     | 2520    | 17649    | 7231   | 2.19     | D     | CHS/responsive to light, defense response      |                           |                             |

C=carbohydrate metabolism, CDC=cell division cycle, CHP=Chaperonin/heat shock protein/folding, CW= Cell wall, D= Defense response, L=Lipid metabolism, MT=membrane/transporter/receptor, OX=oxygen detoxifying enzyme/peroxidase  
SEM= secondary metabolism, SP=Storage protein, STD= signal transduction, T=Transcription factors, UF=unknown function

Red text was validated by qRT-PCR, Blue text was present on the array of Girke et. al. 2000, Plant Physiology 124 :1570-1581 (the relative transcript level of all three genes was observed to be unchanged in embryos).

Table 1b. Genes that exhibit *PKL*-dependent transcription based on the criteria (*Pkl* vs. *Wt*  $p < 0.05$   $\square$  *Upkl* vs. *Uwt*  $p < 0.05$ ) and for which the corresponding transcript level is not elevated two-fold or more in *pkl* seeds in both the absence and presence of uniconazole-P.

Wt=Wild type, Pkl= *pickle* mutant, Uwt=uniconazole-P treated wild type, Upkl= uniconazole-P treated *pickle* mutant  
Mean= mean value for a given treatment, SD= standard deviation of the mean for a given treatment  
Putative identification represents the annotation as available through TAIR  
Ratios are given for specific treatment comparisons and data was sorted by the ratio of Pkl/Uwt  
This data set contains 237 genes

| Affy Code  | AGI Code  | Pkl Mean | Pkl SD | Wt Mean | Wt SD | Pkl/Wt | Upkl Mean | Upkl SD | Uwt Mean | Uwt SD | Upkl/Uwt | Putative Identification                            |
|------------|-----------|----------|--------|---------|-------|--------|-----------|---------|----------|--------|----------|----------------------------------------------------|
| 16426_at   | At1g72730 | 1172     | 232    | 572     | 314   | 2.05   | 1397      | 263     | 723      | 291    | 1.93     | putative Eukaryotic initiation factor 4A           |
| 18807_at   | At1g13170 | 324      | 53     | 136     | 43    | 2.39   | 220       | 47      | 116      | 41     | 1.89     | putative oxysterol-binding protein                 |
| 20360_at   | At1g58290 | 264      | 99     | 120     | 24    | 2.2    | 237       | 68      | 125      | 21     | 1.89     | glutamyl-tRNA reductase, putative                  |
| 16523_s_at | At1g08830 | 14217    | 1819   | 6957    | 4270  | 2.04   | 11688     | 1912    | 6264     | 1724   | 1.87     | superoxidase dismutase                             |
| 19424_at   | At1g24280 | 1163     | 178    | 565     | 239   | 2.06   | 1027      | 191     | 566      | 122    | 1.82     | glucose-6-phosphate 1-dehydrogenase                |
| 12769_at   | At2g37170 | 664      | 73     | 247     | 178   | 2.69   | 558       | 61      | 329      | 158    | 1.7      | aquaporin (plasma membrane intrinsic protein 2B)   |
| 13822_s_at | At2g31540 | -167     | 29     | -21     | 51    | 8.02   | -16       | 53      | -137     | 53     | 0.12     | putative GDSL-motif lipase hydrolase               |
| 14976_at   | At2g24190 | 52       | 32     | 9       | 11    | 6.15   | 138       | 144     | -78      | 64     | -1.77    | putative carbonyl reductase                        |
| 13279_at   | At5g12020 | 588      | 357    | 70      | 167   | 8.43   | 601       | 147     | -165     | 205    | -3.64    | heat shock protein 17.6-II                         |
| 19979_at   | At1g67330 | 543      | 144    | 55      | 317   | 9.95   | 1132      | 76      | -13      | 308    | -87.1    | unknown protein                                    |
| 14720_s_at | At1g35720 | 692      | 204    | 82      | 256   | 8.47   | 786       | 73      | -3       | 212    | -314.3   | Ca2+-dependent membrane-binding protein annexin    |
| 13078_at   | At2g47650 | 2354     | 446    | 1188    | 391   | 1.98   | 2823      | 57      | 1188     | 289    | 2.38     | putative dTDP-glucose 4-6-dehydratase              |
| 14073_at   | At1g54410 | 1577     | 447    | 799     | 401   | 1.97   | 1379      | 395     | 740      | 221    | 1.86     | water stress-induced protein, putative             |
| 15614_s_at | At4g30270 | 4197     | 767    | 2126    | 707   | 1.97   | 4364      | 539     | 1953     | 1079   | 2.24     | endoxyloglucan transferase (meri5B)                |
| 18703_at   | At2g07711 | 387      | 85     | 198     | 63    | 1.96   | 394       | 90      | 100      | 133    | 3.93     | pseudogene                                         |
| 13219_at   | At3g54420 | 419      | 126    | 215     | 33    | 1.95   | 391       | 90      | 141      | 126    | -2.77    | class IV chitinase (CHIV)                          |
| 16015_at   | At1g74470 | 1016     | 134    | 521     | 295   | 1.95   | 1405      | 102     | 503      | 116    | 2.8      | geranylgeranyl reductase                           |
| 13908_s_at | At4g20860 | 1412     | 259    | 736     | 206   | 1.92   | 1465      | 137     | 723      | 382    | 2.03     | berberine bridge enzyme - like protein             |
| 20640_s_at | At1g42970 | 782      | 87     | 410     | 171   | 1.91   | 892       | 126     | 366      | 219    | 2.44     | glyceraldehyde-3-phosphate dehydrogenase           |
| 16423_at   | At2g30570 | 2502     | 408    | 1316    | 694   | 1.9    | 2694      | 639     | 1562     | 589    | 1.73     | photosystem II reaction center 6.1KD protein       |
| 17739_at   | At5g51810 | 329      | 79     | 173     | 77    | 1.9    | 1521      | 216     | 519      | 231    | 2.93     | gibberellin 20-oxidase (emb CAA58294.1)            |
| 13254_at   | At4g17190 | 3431     | 332    | 1835    | 563   | 1.87   | 3422      | 437     | 2329     | 381    | 1.47     | farnesyl-pyrophosphate synthetase FPS2             |
| 14018_at   | At1g09750 | 2414     | 469    | 1290    | 372   | 1.87   | 3802      | 102     | 1450     | 204    | 2.62     | hypothetical protein                               |
| 14039_at   | At2g19590 | 12609    | 1969   | 6757    | 3089  | 1.87   | 11436     | 1152    | 5102     | 1689   | 2.24     | 1-aminocyclopropane-1-carboxylate oxidase          |
| 14117_at   | At4g37410 | 3246     | 804    | 1736    | 636   | 1.87   | 3057      | 271     | 1571     | 463    | 1.95     | cytochrome P450 monooxygenase - like protein       |
| 15985_at   | At5g64100 | 16755    | 2207   | 9063    | 4176  | 1.85   | 17824     | 729     | 9735     | 3834   | 1.83     | peroxidase ATP3a (emb CAA67340.1)                  |
| 16008_i_at | At2g47730 | 3594     | 459    | 1952    | 1098  | 1.84   | 4701      | 127     | 2533     | 853    | 1.86     | glutathione S-transferase (GST6)                   |
| 16288_at   | At2g17720 | 551      | 57     | 304     | 69    | 1.81   | 797       | 64      | 391      | 51     | 2.04     | putative prolyl 4-hydroxylase, alpha subunit       |
| 16035_at   | At5g02380 | 39437    | 3171   | 21854   | 11089 | 1.8    | 34438     | 1552    | 19889    | 2810   | 1.73     | metallothionein 2b                                 |
| 13119_at   | At1g78570 | 2742     | 436    | 1532    | 774   | 1.79   | 3313      | 220     | 1378     | 605    | 2.4      | dTDP-glucose 4,6-dehydratase, putative             |
| 17070_at   | At1g18250 | 2648     | 345    | 1485    | 769   | 1.78   | 2846      | 369     | 1783     | 320    | 1.6      | pathogenesis-related group 5 protein, putative     |
| 13609_at   | At4g22010 | 3136     | 264    | 1769    | 499   | 1.77   | 3518      | 348     | 2519     | 148    | 1.4      | pectinesterase like protein                        |
| 17697_at   | At2g46740 | 1269     | 168    | 719     | 416   | 1.77   | 839       | 147     | 628      | 71     | 1.34     | unknown protein                                    |
| 19127_at   | At2g03750 | 258      | 55     | 146     | 72    | 1.77   | 481       | 60      | 190      | 109    | 2.53     | putative steroid sulfotransferase                  |
| 12932_s_at | At5g57090 | 3068     | 484    | 1747    | 937   | 1.76   | 2629      | 390     | 1813     | 366    | 1.45     | auxin transport protein EIR1 (gb AAC39513.1)       |
| 18660_at   | At4g17670 | 443      | 108    | 253     | 72    | 1.75   | 458       | 23      | 97       | 115    | 4.72     | \NULL                                              |
| 15990_at   | At3g55800 | 639      | 102    | 367     | 115   | 1.74   | 843       | 78      | 504      | 214    | 1.67     | sedoheptulose-bisphosphatase precursor             |
| 13201_at   | At5g54740 | 1777     | 366    | 1028    | 423   | 1.73   | 1987      | 205     | 638      | 231    | 3.11     | 2S storage protein-like                            |
| 12515_at   | At2g39700 | 1354     | 114    | 787     | 319   | 1.72   | 1336      | 193     | 986      | 181    | 1.35     | putative expansin                                  |
| 20616_at   | At2g32560 | 4529     | 859    | 2633    | 988   | 1.72   | 3550      | 354     | 1323     | 570    | 2.68     | unknown protein                                    |
| 18939_at   | At1g30490 | 186      | 49     | 109     | 13    | 1.71   | 194       | 39      | 106      | 57     | 1.83     | HD-Zip protein                                     |
| 16605_s_at | At5g08640 | 2638     | 349    | 1553    | 454   | 1.7    | 3460      | 208     | 1707     | 997    | 2.03     | flavonol synthase (FLS) (sp Q96330)                |
| 12786_at   | At1g78660 | 2353     | 263    | 1400    | 270   | 1.68   | 2703      | 198     | 1629     | 520    | 1.66     | gamma glutamyl hydrolase, putative                 |
| 19448_s_at | At1g70710 | 2172     | 477    | 1295    | 71    | 1.68   | 2717      | 378     | 1359     | 135    | 2        | endo-1,4-beta-glucanase                            |
| 20317_at   | At1g48480 | 637      | 107    | 380     | 94    | 1.68   | 556       | 119     | 302      | 94     | 1.84     | protein kinase, putative                           |
| 16949_s_at | At4g12880 | 3501     | 373    | 2106    | 1016  | 1.66   | 3410      | 306     | 2002     | 544    | 1.7      | blue copper-binding protein, 15K (lamin)           |
| 17255_at   | At2g25980 | 1901     | 174    | 1142    | 371   | 1.66   | 2687      | 286     | 1645     | 234    | 1.63     | similar to jasmonate-inducible proteins from Brass |
| 16977_at   | At4g40060 | 6328     | 1814   | 3853    | 376   | 1.64   | 4886      | 406     | 2514     | 585    | 1.94     | homeodomain - like protein                         |
| 16637_s_at | At4g14890 | 1674     | 121    | 1026    | 513   | 1.63   | 1784      | 183     | 960      | 406    | 1.86     | Expressed protein                                  |
| 16974_at   | At4g15160 | 2427     | 693    | 1492    | 265   | 1.63   | 4823      | 207     | 1987     | 324    | 2.43     | cell wall protein like                             |
| 19815_at   | At1g14210 | 1400     | 97     | 859     | 392   | 1.63   | 1359      | 151     | 813      | 247    | 1.67     | ribonuclease                                       |
| 14729_s_at | At3g26650 | 2901     | 231    | 1793    | 648   | 1.62   | 3067      | 303     | 2140     | 587    | 1.43     | glyceraldehyde 3-phosphate dehydrogenase A subunit |
| 18991_s_at | At3g27660 | 3497     | 976    | 2173    | 318   | 1.61   | 5719      | 170     | 1509     | 476    | 3.79     | oleosin isoform                                    |
| 20155_s_at | At4g26130 | 794      | 142    | 492     | 76    | 1.61   | 1180      | 122     | 371      | 194    | 3.18     | uncharacterized protein                            |
| 19217_at   | At1g05510 | 484      | 109    | 304     | 67    | 1.6    | 815       | 92      | 184      | 145    | 4.42     | hypothetical protein                               |
| 13441_at   | At4g30996 | 2047     | 262    | 1285    | 274   | 1.59   | 1720      | 242     | 1219     | 204    | 1.41     | Expressed protein                                  |
| 13887_s_at | At2g33620 | 796      | 60     | 500     | 204   | 1.59   | 750       | 114     | 388      | 98     | 1.93     | AT-hook DNA-binding protein (AHP1)                 |
| 16429_at   | At1g07890 | 21484    | 1412   | 13520   | 4773  | 1.59   | 18807     | 1668    | 11704    | 2222   | 1.61     | L-ascorbate peroxidase                             |
| 16432_g_at | At2g38530 | 18489    | 2367   | 11617   | 4304  | 1.59   | 15087     | 3699    | 9228     | 1521   | 1.63     | putative nonspecific lipid-transfer protein        |
| 16493_at   | At1g54010 | 69667    | 9110   | 44121   | 11408 | 1.58   | 77370     | 6349    | 51669    | 10945  | 1.5      | myrosinase-associated protein, putative            |
| 13118_f_at | At1g75480 | 3260     | 246    | 2074    | 739   | 1.57   | 3715      | 340     | 2383     | 307    | 1.56     | pseudogene, gamma-glutamyl hydrolase               |
| 13218_s_at | At1g20620 | 1785     | 222    | 1141    | 364   | 1.57   | 2985      | 291     | 995      | 356    | 3        | catalase 3                                         |
| 16009_s_at | At2g47730 | 3090     | 213    | 1962    | 679   | 1.57   | 4436      | 316     | 2436     | 735    | 1.82     | glutathione S-transferase (GST6)                   |
| 13177_at   | At4g12720 | 377      | 75     | 242     | 37    | 1.56   | 367       | 71      | 203      | 56     | 1.81     | growth factor like protein                         |
| 14547_at   | At4g03190 | 750      | 102    | 480     | 117   | 1.56   | 691       | 7       | 544      | 34     | 1.27     | F-box protein GRR1-like protein 1, AtFBL18         |
| 15672_s_at | At2g22470 | 1365     | 288    | 882     | 228   | 1.55   | 1022      | 128     | 599      | 157    | 1.7      | unknown protein                                    |
| 20321_s_at | At1g73190 | 3291     | 563    | 2121    | 407   | 1.55   | 5887      | 136     | 1850     | 414    | 3.18     | tonoplast intrinsic protein, alpha (alpha-TIP)     |
| 14118_i_at | \NULL     | 930      | 236    | 605     | 73    | 1.54   | 902       | 104     | 558      | 139    | 1.62     | \NULL                                              |
| 15189_s_at | At2g42840 | 49015    | 7668   | 32013   | 10521 | 1.53   | 49516     | 4005    | 32518    | 8225   | 1.52     | En Spm-like transposon protein                     |
| 18232_at   | At2g23910 | 1385     | 36     | 905     | 265   | 1.53   | 1285      | 129     | 894      | 143    | 1.44     | putative cinnamoyl CoA reductase                   |
| 12741_at   | At4g38970 | 3393     | 486    | 2247    | 576   | 1.51   | 4405      | 357     | 2670     | 662    | 1.65     | putative fructose-bisphosphate aldolase            |
| 12966_s_at | At4g34590 | 676      | 91     | 447     | 126   | 1.51   | 751       | 87      | 502      | 66     | 1.5      | bZIP transcription factor ATB2                     |
| 14080_at   | At4g37470 | 3798     | 540    | 2517    | 449   | 1.51   | 3416      | 540     | 2147     | 292    | 1.59     | putative protein                                   |
| 14504_s_at | At2g28200 | 1046     | 54     | 691     | 177   | 1.51   | 1032      | 92      | 547      | 384    | 1.89     | putative zinc-finger protein                       |
| 15451_at   | At5g64620 | 2231     | 199    | 1482    | 246   | 1.51   | 3497      | 215     | 1728     | 522    | 2.02     | invertase inhibitor homolog (emb CAA73335.1)       |

Table 1b. (cont'd)

|            |           |       |       |       |      |      |       |       |       |      |      |                                                     |
|------------|-----------|-------|-------|-------|------|------|-------|-------|-------|------|------|-----------------------------------------------------|
| 18622_g_at | At4g23710 | 1866  | 230   | 1245  | 363  | 1.5  | 1478  | 146   | 1064  | 147  | 1.39 | V-ATPase subunit G (vag2 gene)                      |
| 20529_at   | At4g16500 | 10375 | 1059  | 6916  | 2335 | 1.5  | 9933  | 1346  | 5069  | 650  | 1.96 | cysteine proteinase inhibitor like protein          |
| 12167_at   | At3g51670 | 956   | 170   | 643   | 130  | 1.49 | 1074  | 75    | 626   | 144  | 1.72 | putative protein                                    |
| 13240_f_at | At3g16770 | 5117  | 523   | 3426  | 454  | 1.49 | 4774  | 953   | 2518  | 888  | 1.9  | AP2 domain containing protein RAP2.3                |
| 16038_s_at | At5g66400 | 10814 | 2439  | 7270  | 913  | 1.49 | 14005 | 1041  | 6178  | 652  | 2.27 | dehydrin RAB18-like protein (sp P30185)             |
| 18311_at   | At1g53840 | 760   | 163   | 509   | 58   | 1.49 | 1026  | 30    | 434   | 105  | 2.37 | pectinesterase, putative                            |
| 13052_s_at | At1g47670 | 2428  | 472   | 1643  | 234  | 1.48 | 2713  | 324   | 1574  | 340  | 1.72 | lysine and histidine specific transporter, putative |
| 15111_s_at | At2g06850 | 6573  | 834   | 4441  | 1390 | 1.48 | 6200  | 541   | 4833  | 313  | 1.28 | putative endoxylglucan glycosyltransferase          |
| 16598_s_at | At1g70370 | 1957  | 221   | 1325  | 179  | 1.48 | 2441  | 202   | 1753  | 136  | 1.39 | aromatic rich glycoprotein, putative                |
| 17488_at   | At2g25810 | 983   | 79    | 665   | 183  | 1.48 | 934   | 35    | 613   | 153  | 1.52 | putative aquaporin (tonoplast intrinsic protein)    |
| 18090_s_at | At4g28750 | 634   | 38    | 428   | 43   | 1.48 | 610   | 63    | 358   | 96   | 1.71 | photosystem I subunit PSI-E - like protein          |
| 17009_at   | At4g31340 | 5195  | 1069  | 3543  | 263  | 1.47 | 4922  | 353   | 3139  | 588  | 1.57 | putative protein                                    |
| 15834_at   | At2g07000 | 547   | 40    | 374   | 101  | 1.46 | 583   | 66    | 459   | 75   | 1.27 | unknown protein                                     |
| 16517_at   | At5g13630 | 636   | 29    | 436   | 117  | 1.46 | 908   | 159   | 459   | 236  | 1.98 | cobalamin biosynthesis protein                      |
| 18159_at   | At1g27680 | 794   | 75    | 547   | 91   | 1.45 | 834   | 30    | 636   | 79   | 1.31 | ADP-glucose pyrophosphorylase, putative             |
| 20238_at   | At3g13790 | 8931  | 1966  | 6182  | 717  | 1.44 | 10366 | 1951  | 6959  | 1471 | 1.49 | beta-fructofuranosidase 1                           |
| 17938_at   | At5g65360 | 11571 | 652   | 8100  | 2192 | 1.44 | 11248 | 1082  | 8265  | 1556 | 1.36 | histone H3 (sp P05203)                              |
| 12752_s_at | At4g21960 | 1694  | 291   | 1191  | 205  | 1.42 | 2840  | 388   | 1794  | 369  | 1.58 | peroxidase prxr1                                    |
| 15594_s_at | At5g07440 | 2636  | 204   | 1859  | 202  | 1.42 | 2040  | 321   | 1510  | 99   | 1.35 | glutamate dehydrogenase 2                           |
| 13197_r_at | At4g27170 | 9181  | 1867  | 6598  | 342  | 1.39 | 7165  | 1690  | 4816  | 464  | 1.49 | NWMIJ4 - 2S albumin 4 precursor                     |
| 19839_at   | At2g28790 | 7119  | 1097  | 5137  | 837  | 1.39 | 11500 | 1194  | 5630  | 1783 | 2.04 | putative thaumatin                                  |
| 14962_at   | At1g04520 | 848   | 72    | 615   | 91   | 1.38 | 998   | 194   | 672   | 86   | 1.49 | unknown protein                                     |
| 15126_s_at | At2g31360 | 6472  | 659   | 4687  | 716  | 1.38 | 6436  | 458   | 4855  | 309  | 1.33 | delta 9 desaturase                                  |
| 12817_g_at | At1g78830 | 1456  | 123   | 1060  | 185  | 1.37 | 1602  | 326   | 924   | 300  | 1.73 | hypothetical protein                                |
| 17523_s_at | At3g53610 | 892   | 67    | 650   | 79   | 1.37 | 930   | 128   | 486   | 115  | 1.91 | GTPase AtRAB8                                       |
| 12792_s_at | At2g45180 | 20395 | 1239  | 15005 | 3720 | 1.36 | 26965 | 1366  | 15778 | 3530 | 1.71 | unknown protein                                     |
| 14921_at   | At2g20930 | 1612  | 201   | 1183  | 250  | 1.36 | 1614  | 139   | 1356  | 126  | 1.19 | unknown protein                                     |
| 13573_at   | At4g37550 | 1037  | 101   | 766   | 96   | 1.35 | 1625  | 201   | 975   | 301  | 1.67 | formamidase - like protein                          |
| 12421_at   | At4g26650 | 1329  | 168   | 993   | 43   | 1.34 | 1371  | 90    | 942   | 232  | 1.46 | hnRNP-like protein                                  |
| 13137_at   | At2g31380 | 5256  | 573   | 3911  | 722  | 1.34 | 6337  | 50    | 3877  | 293  | 1.63 | putative CONSTANS-like B-box zinc finger protein    |
| 15551_at   | At4g26910 | 1517  | 111   | 1136  | 211  | 1.34 | 1480  | 282   | 942   | 264  | 1.57 | putative dihydroipoamide succinyltransferase        |
| 18581_at   | At2g29340 | 442   | 40    | 331   | 43   | 1.34 | 689   | 147   | 314   | 173  | 2.2  | putative tropinone reductase                        |
| 18933_at   | At2g40300 | 1552  | 151   | 1163  | 171  | 1.34 | 1728  | 160   | 1411  | 169  | 1.22 | putative ferritin                                   |
| 20156_at   | At3g52470 | 9267  | 596   | 6961  | 1169 | 1.33 | 6916  | 720   | 5018  | 610  | 1.38 | putative protein                                    |
| 12171_at   | At3g52500 | 1353  | 194   | 1026  | 152  | 1.32 | 1977  | 58    | 937   | 166  | 2.11 | expressed protein                                   |
| 13116_at   | At2g20760 | 4390  | 628   | 3338  | 547  | 1.32 | 4383  | 450   | 2825  | 266  | 1.55 | unknown protein                                     |
| 20385_at   | At1g32200 | 1663  | 203   | 1257  | 231  | 1.32 | 1581  | 303   | 1115  | 178  | 1.42 | glycerol-3-phosphate acyltransferase                |
| 12779_f_at | At1g54000 | 10543 | 824   | 8062  | 986  | 1.31 | 13738 | 463   | 8632  | 463  | 1.59 | myosinase-associated protein, putative              |
| 13154_s_at | At2g43590 | 7975  | 999   | 6106  | 610  | 1.31 | 6533  | 474   | 4157  | 1266 | 1.57 | putative endochitinase                              |
| 16044_s_at | At1g55670 | 562   | 74    | 431   | 11   | 1.31 | 685   | 121   | 507   | 62   | 1.35 | photosystem I subunit V precursor, putative         |
| 14421_at   | At2g24290 | 889   | 101   | 690   | 125  | 1.29 | 987   | 104   | 641   | 126  | 1.54 | unknown protein                                     |
| 18330_at   | At4g23850 | 1675  | 244   | 1306  | 162  | 1.28 | 1787  | 198   | 1078  | 197  | 1.66 | acyl-CoA synthetase - like protein                  |
| 16631_s_at | At2g34470 | 2348  | 114   | 1882  | 252  | 1.25 | 2469  | 141   | 2012  | 309  | 1.23 | putative urease accessory protein                   |
| 15988_at   | At5g44340 | 13437 | 1279  | 10959 | 1243 | 1.23 | 14534 | 551   | 11554 | 925  | 1.26 | tubulin beta-4 chain (sp P24636)                    |
| 17382_at   | At2g36290 | 2328  | 238   | 1906  | 67   | 1.22 | 2647  | 242   | 1889  | 451  | 1.4  | unknown protein                                     |
| 13089_at   | At2g27860 | 15799 | 1311  | 13448 | 711  | 1.17 | 15251 | 365   | 13347 | 1074 | 1.14 | putative dTDP-glucose 4-6-dehydratase               |
| 16504_at   | At4g13930 | 16945 | 1430  | 14566 | 1288 | 1.16 | 17859 | 1823  | 13803 | 688  | 1.29 | hydroxymethyltransferase                            |
| 17878_at   | At4g19410 | 3545  | 160   | 3075  | 84   | 1.15 | 3882  | 95    | 3205  | 327  | 1.21 | putative pectinacetyltransferase protein            |
| 16902_at   | At2g21620 | 2041  | 57    | 1879  | 107  | 1.09 | 2466  | 373   | 1945  | 160  | 1.27 | unknown protein                                     |
| 12796_s_at | At2g26250 | 5787  | 301   | 6403  | 151  | 0.9  | 5375  | 281   | 6607  | 121  | 0.81 | beta-ketoacyl-CoA synthase (FIDDLEHEAD)             |
| 15902_at   | At1g10180 | 707   | 43    | 833   | 51   | 0.85 | 751   | 95    | 947   | 88   | 0.79 | unknown protein                                     |
| 19930_at   | At5g08620 | 2489  | 163   | 2924  | 191  | 0.85 | 2429  | 243   | 3310  | 482  | 0.73 | RNA helicase (emb CAA09212.1)                       |
| 16069_s_at | At1g23860 | 5408  | 602   | 6420  | 497  | 0.84 | 5419  | 1842  | 7772  | 402  | 0.7  | splicing factor, putative                           |
| 16102_s_at | At4g57610 | 3839  | 409   | 4569  | 388  | 0.84 | 3521  | 861   | 4713  | 184  | 0.75 | adenylosuccinate synthetase                         |
| 17463_at   | At1g79530 | 6158  | 460   | 7330  | 534  | 0.84 | 6570  | 664   | 8183  | 541  | 0.8  | glyceraldehyde-3-phosphate dehydrogenase, putative  |
| 17924_at   | At5g07340 | 3832  | 285   | 4612  | 364  | 0.83 | 3277  | 412   | 4489  | 574  | 0.73 | calnexin homolog                                    |
| 18002_at   | At5g52470 | 13490 | 1403  | 16207 | 1598 | 0.83 | 13467 | 2234  | 17638 | 2288 | 0.76 | fibrillarin 1 AtFib1 SKIP7                          |
| 20639_at   | At4g37910 | 7645  | 256   | 9341  | 413  | 0.82 | 7778  | 638   | 9687  | 779  | 0.8  | heat shock protein 70 like protein                  |
| 12613_at   | At2g34750 | 2157  | 261   | 2678  | 234  | 0.81 | 2203  | 360   | 2749  | 31   | 0.8  | unknown protein                                     |
| 12794_at   | At2g37270 | 12846 | 1799  | 15782 | 975  | 0.81 | 11535 | 2130  | 16462 | 328  | 0.7  | 40S ribosomal protein S5                            |
| 13560_at   | At1g16270 | 1750  | 219   | 2149  | 224  | 0.81 | 1968  | 15    | 2213  | 148  | 0.89 | putative Ser Thr protein kinase                     |
| 14531_at   | At4g02680 | 2004  | 224   | 2465  | 274  | 0.81 | 2167  | 226   | 2797  | 164  | 0.77 | hypothetical protein                                |
| 14688_at   | At2g37490 | 986   | 111   | 1212  | 123  | 0.81 | 1198  | 151   | 1421  | 42   | 0.84 | unknown protein                                     |
| 15082_at   | At1g15140 | 1036  | 72    | 1289  | 105  | 0.8  | 989   | 234   | 1352  | 143  | 0.73 | unknown protein                                     |
| 18010_s_at | At3g54110 | 9378  | 923   | 11781 | 327  | 0.8  | 8602  | 394   | 11138 | 459  | 0.77 | uncoupling protein (ucp PUMP)                       |
| 19407_at   | NULL      | 697   | 103   | 868   | 74   | 0.8  | 574   | 148   | 801   | 104  | 0.72 | NULL                                                |
| 20344_at   | At2g15090 | 2206  | 280   | 2770  | 200  | 0.8  | 1498  | 443   | 2364  | 182  | 0.63 | putative fatty acid elongase                        |
| 19190_g_at | At4g38580 | 7037  | 497   | 8956  | 1384 | 0.79 | 5804  | 612   | 8325  | 782  | 0.7  | farnesylated protein (ATFP6)                        |
| 18369_at   | At4g16390 | 1554  | 107   | 2002  | 334  | 0.78 | 1523  | 370   | 2218  | 313  | 0.69 | salt-inducible protein homolog                      |
| 19471_at   | At4g32300 | 698   | 92    | 893   | 128  | 0.78 | 727   | 78    | 520   | 113  | 1.4  | S-receptor kinase -like protein                     |
| 12002_at   | At4g02940 | 1597  | 174   | 2082  | 324  | 0.77 | 1311  | 415   | 2016  | 51   | 0.65 | hypothetical protein                                |
| 13896_at   | At1g60140 | 424   | 72    | 553   | 57   | 0.77 | 500   | 85    | 670   | 36   | 0.75 | trehalose-6-phosphate synthase, putative            |
| 18713_at   | At4g02930 | 11658 | 2242  | 15083 | 1603 | 0.77 | 10684 | 1140  | 13951 | 741  | 0.77 | mitochondrial elongation factor Tu                  |
| 16025_s_at | At4g28520 | 3846  | 589   | 5051  | 741  | 0.76 | 9037  | 808   | 5008  | 892  | 1.8  | 12S cruciferin seed storage protein                 |
| 18716_at   | At1g75830 | 52560 | 12729 | 69549 | 3490 | 0.76 | 36233 | 11721 | 58869 | 668  | 0.62 | unknown protein                                     |
| 19670_at   | At4g10450 | 10795 | 1119  | 14248 | 1176 | 0.76 | 10260 | 1875  | 14505 | 934  | 0.71 | putative ribosomal protein L9, cytosolic            |
| 12485_at   | At4g32520 | 3420  | 512   | 4588  | 532  | 0.75 | 3155  | 281   | 4629  | 261  | 0.68 | glycine hydroxymethyltransferase (EC 2.1.2.1) - li  |
| 14416_at   | At2g14880 | 3754  | 440   | 4998  | 727  | 0.75 | 4409  | 199   | 5622  | 471  | 0.78 | unknown protein                                     |
| 16451_at   | At3g58610 | 17563 | 1682  | 23414 | 1568 | 0.75 | 19012 | 1073  | 22716 | 769  | 0.84 | ketol-acid reductoisomerase                         |
| 20314_s_at | At4g11240 | 2192  | 137   | 2933  | 212  | 0.75 | 2278  | 373   | 3182  | 166  | 0.72 | protein phosphatase type 1 PP1BG                    |
| 13592_g_at | At4g21810 | 2611  | 413   | 3548  | 506  | 0.74 | 2117  | 698   | 3769  | 252  | 0.56 | putative protein                                    |
| 14126_s_at | At4g34740 | 2829  | 491   | 3804  | 387  | 0.74 | 2808  | 680   | 4260  | 304  | 0.66 | amidophosphoribosyltransferase 2 precursor          |

Table 1b. (cont'd)

|            |           |       |      |       |      |        |       |      |       |      |        |                                                    |
|------------|-----------|-------|------|-------|------|--------|-------|------|-------|------|--------|----------------------------------------------------|
| 14651_at   | At1g23820 | 9616  | 1748 | 12963 | 1420 | 0.74   | 10191 | 2764 | 14264 | 473  | 0.71   | putative spermidine synthase                       |
| 15143_s_at | At4g11840 | 385   | 70   | 521   | 36   | 0.74   | 547   | 88   | 416   | 34   | 1.31   | putative phospholipase D-gamma                     |
| 18280_at   | At1g21000 | 1359  | 209  | 1843  | 315  | 0.74   | 1498  | 190  | 2095  | 158  | 0.71   | unknown protein                                    |
| 18659_at   | At5g45350 | 1670  | 278  | 2262  | 389  | 0.74   | 1618  | 172  | 2202  | 110  | 0.73   | unknown protein                                    |
| 18710_at   | At5g11770 | 7567  | 1389 | 10193 | 780  | 0.74   | 7897  | 786  | 10310 | 394  | 0.77   | NADH dehydrogenase (ubiquinone)                    |
| 12484_g_at | At2g37690 | 1285  | 215  | 1763  | 284  | 0.73   | 1423  | 116  | 1862  | 216  | 0.76   | putative phosphoribosylaminoimidazole carboxylase  |
| 15928_at   | At1g49510 | 1010  | 188  | 1384  | 128  | 0.73   | 1103  | 192  | 1449  | 115  | 0.76   | unknown protein                                    |
| 17484_at   | At1g17020 | 8205  | 1908 | 11166 | 1055 | 0.73   | 6529  | 2454 | 11904 | 1206 | 0.55   | SRG1-like protein                                  |
| 19227_at   | At4g13830 | 1305  | 106  | 1798  | 361  | 0.73   | 1166  | 109  | 1653  | 112  | 0.71   | DnaJ-like protein                                  |
| 19830_at   | At2g15690 | 2640  | 615  | 3611  | 303  | 0.73   | 2733  | 390  | 3972  | 417  | 0.69   | Expressed protein                                  |
| 20041_at   | At1g49850 | 910   | 212  | 1250  | 157  | 0.73   | 868   | 114  | 1137  | 65   | 0.76   | RING-H2 finger protein RHY1a                       |
| 13292_at   | At1g04550 | 549   | 122  | 758   | 81   | 0.72   | 576   | 239  | 978   | 67   | 0.59   | putative auxin-induced protein, IAA12              |
| 13868_at   | At1g15440 | 1789  | 260  | 2487  | 398  | 0.72   | 1760  | 293  | 2763  | 319  | 0.64   | hypothetical protein                               |
| 15155_s_at | At1g43170 | 22569 | 4001 | 31328 | 1146 | 0.72   | 23090 | 1683 | 28886 | 2510 | 0.8    | ribosomal protein                                  |
| 15179_s_at | At3g01120 | 5362  | 624  | 7405  | 1471 | 0.72   | 5321  | 491  | 7508  | 667  | 0.71   | putative cystathionine gamma-synthase              |
| 12251_at   | At2g34930 | 1659  | 345  | 2341  | 380  | 0.71   | 1453  | 700  | 2572  | 109  | 0.56   | putative disease resistance protein                |
| 13467_at   | At3g47420 | 2195  | 169  | 3098  | 484  | 0.71   | 1892  | 742  | 3132  | 266  | 0.6    | putative protein                                   |
| 15578_s_at | At2g27050 | 870   | 145  | 1220  | 111  | 0.71   | 782   | 133  | 1123  | 114  | 0.7    | ethylene-insensitive3-like1 (EIL1)                 |
| 13237_at   | At4g33510 | 1664  | 332  | 2426  | 310  | 0.69   | 1821  | 551  | 2822  | 126  | 0.65   | 2-dehydro-3-deoxyphosphoheptonate aldolase         |
| 13561_at   | NULL      | 1363  | 214  | 1968  | 310  | 0.69   | 1128  | 128  | 1679  | 131  | 0.67   | NULL                                               |
| 14384_at   | At2g35040 | 2812  | 275  | 4065  | 475  | 0.69   | 2885  | 686  | 4124  | 492  | 0.7    | putative phosphoribosylaminoimidazolecarboxamide f |
| 16290_at   | At4g04940 | 874   | 166  | 1260  | 116  | 0.69   | 769   | 178  | 1323  | 126  | 0.58   | putative WD-repeat membrane protein                |
| 19124_i_at | At1g14920 | 657   | 198  | 957   | 138  | 0.69   | 620   | 51   | 765   | 32   | 0.81   | signal response protein (GAI)                      |
| 20005_s_at | At2g47990 | 2556  | 556  | 3690  | 605  | 0.69   | 2200  | 368  | 3224  | 414  | 0.68   | unknown protein                                    |
| 20668_at   | At2g45240 | 1623  | 319  | 2366  | 175  | 0.69   | 1823  | 267  | 2311  | 195  | 0.79   | putative methionine aminopeptidase                 |
| 12268_at   | At4g13910 | 4761  | 907  | 6991  | 253  | 0.68   | 4522  | 477  | 6309  | 1036 | 0.72   | putative disease resistance protein                |
| 14381_at   | At2g02810 | 342   | 36   | 501   | 121  | 0.68   | 319   | 54   | 473   | 52   | 0.68   | unknown protein                                    |
| 19915_at   | At2g32070 | 1523  | 173  | 2237  | 397  | 0.68   | 1451  | 154  | 1918  | 167  | 0.76   | putative CCR4-associated factor                    |
| 13591_at   | At4g21810 | 1522  | 456  | 2288  | 340  | 0.67   | 1392  | 421  | 2219  | 186  | 0.63   | putative protein                                   |
| 14945_at   | At4g25620 | 431   | 33   | 648   | 122  | 0.67   | 399   | 80   | 585   | 93   | 0.68   | putative protein                                   |
| 17426_at   | At1g78080 | 927   | 138  | 1393  | 283  | 0.67   | 585   | 209  | 1126  | 125  | 0.52   | AP2 domain containing protein, putative            |
| 19376_at   | At2g17760 | 634   | 81   | 948   | 199  | 0.67   | 527   | 153  | 845   | 105  | 0.62   | putative chloroplast nucleoid DNA-binding protein  |
| 20507_at   | At4g22720 | 765   | 187  | 1157  | 152  | 0.66   | 805   | 164  | 1335  | 88   | 0.6    | glycoprotein endopeptidase - like protein          |
| 16086_s_at | At2g16570 | 2653  | 718  | 4080  | 595  | 0.65   | 2399  | 880  | 4512  | 245  | 0.53   | amidophosphoribosyltransferase                     |
| 17178_at   | At1g20910 | 374   | 54   | 574   | 38   | 0.65   | 326   | 118  | 511   | 81   | 0.64   | hypothetical protein                               |
| 11996_at   | At2g39020 | 3405  | 821  | 5358  | 1077 | 0.64   | 3991  | 521  | 5475  | 390  | 0.73   | unknown protein                                    |
| 12436_at   | At4g27680 | 620   | 157  | 975   | 43   | 0.64   | 744   | 125  | 1008  | 14   | 0.74   | putative protein                                   |
| 15421_at   | At4g01410 | 866   | 261  | 1360  | 206  | 0.64   | 746   | 135  | 986   | 124  | 0.76   | putative hypersensitive response protein           |
| 15647_s_at | At4g14680 | 899   | 174  | 1412  | 189  | 0.64   | 816   | 224  | 1193  | 49   | 0.68   | ATP-sulfurylase                                    |
| 14077_at   | At4g08950 | 2290  | 632  | 3650  | 484  | 0.63   | 1426  | 494  | 2723  | 391  | 0.52   | putative phi-1-like phosphate-induced protein      |
| 18596_at   | At1g62570 | 1792  | 338  | 2847  | 492  | 0.63   | 1453  | 341  | 2356  | 147  | 0.62   | flavin-containing monooxygenase, putative          |
| 15186_s_at | At1g62180 | 1344  | 346  | 2167  | 375  | 0.62   | 1110  | 363  | 1804  | 163  | 0.62   | 5-adenylylphosphosulfate reductase, putative       |
| 16062_s_at | At4g25470 | 2177  | 375  | 3517  | 162  | 0.62   | 2394  | 552  | 3580  | 292  | 0.67   | DRE CRT-binding protein DREB1C                     |
| 13355_at   | At5g07360 | 765   | 200  | 1264  | 336  | 0.61   | 996   | 204  | 1377  | 111  | 0.72   | putative amidase                                   |
| 15674_at   | At3g25585 | 913   | 277  | 1490  | 248  | 0.61   | 881   | 243  | 1568  | 59   | 0.56   | aminoalcoholphosphotransferase, putative           |
| 16045_at   | At4g15390 | 11396 | 2617 | 18532 | 4185 | 0.61   | 12724 | 953  | 17977 | 1598 | 0.71   | HSR201 like protein                                |
| 18696_s_at | At1g62180 | 780   | 223  | 1273  | 286  | 0.61   | 607   | 178  | 989   | 58   | 0.61   | 5-adenylylphosphosulfate reductase, putative       |
| 12072_at   | At4g25170 | 1279  | 350  | 2122  | 238  | 0.6    | 1353  | 122  | 1775  | 130  | 0.76   | putative protein                                   |
| 15178_s_at | At4g14130 | 2728  | 967  | 4700  | 578  | 0.58   | 2181  | 465  | 5138  | 173  | 0.42   | xyloglucan endotransglycosylase-related protein XT |
| 13099_s_at | At1g22710 | 2729  | 542  | 4777  | 847  | 0.57   | 2424  | 1062 | 4903  | 140  | 0.49   | putative sucrose transport protein, SUC2           |
| 15109_s_at | At1g12110 | 1919  | 512  | 3429  | 571  | 0.56   | 1690  | 319  | 3607  | 229  | 0.47   | putative NPK1-related protein kinase 2             |
| 12169_i_at | At4g33960 | 683   | 355  | 1245  | 281  | 0.55   | 693   | 401  | 1529  | 70   | 0.45   | putative protein                                   |
| 14367_at   | At1g60190 | 673   | 351  | 1274  | 249  | 0.53   | 589   | 133  | 1067  | 61   | 0.55   | hypothetical protein                               |
| 20517_at   | At5g59430 | 298   | 124  | 557   | 137  | 0.53   | 346   | 163  | 628   | 85   | 0.55   | telomere repeat-binding protein                    |
| 17545_s_at | At4g37580 | 2825  | 1511 | 5606  | 996  | 0.5    | 2186  | 2084 | 5597  | 478  | 0.39   | probable N-acetyltransferase hookless 1            |
| 18250_at   | At5g16990 | 142   | 45   | 281   | 68   | 0.5    | 178   | 52   | 292   | 32   | 0.61   | quinone oxidoreductase - like protein              |
| 20450_at   | At5g24150 | 1927  | 1049 | 3879  | 853  | 0.5    | 1450  | 760  | 3989  | 309  | 0.36   | squalene monooxygenase                             |
| 12166_i_at | At4g04830 | 763   | 377  | 1570  | 410  | 0.49   | 637   | 202  | 1612  | 82   | 0.4    | putative protein                                   |
| 20117_at   | At4g16370 | 395   | 169  | 801   | 223  | 0.49   | 361   | 99   | 886   | 46   | 0.41   | isp4 like protein                                  |
| 14789_at   | At2g15010 | 520   | 216  | 1073  | 298  | 0.48   | 656   | 96   | 1104  | 106  | 0.59   | putative thionin                                   |
| 12946_at   | At1g15110 | 140   | 29   | 298   | 65   | 0.47   | 148   | 57   | 225   | 18   | 0.66   | putative phosphatidylserine synthase               |
| 19878_at   | At4g08290 | 2194  | 1392 | 4764  | 1298 | 0.46   | 1361  | 540  | 3838  | 328  | 0.35   | nodulin-like protein                               |
| 20175_at   | At2g28420 | 5336  | 2609 | 11477 | 3119 | 0.46   | 5276  | 1522 | 14491 | 866  | 0.36   | unknown protein                                    |
| 20283_at   | NULL      | 414   | 308  | 894   | 154  | 0.46   | 742   | 326  | 1349  | 164  | 0.55   | NULL                                               |
| 19516_at   | At1g54730 | 185   | 115  | 469   | 77   | 0.39   | 319   | 82   | 509   | 58   | 0.63   | integral membrane protein, putative                |
| 16667_at   | At3g48130 | 140   | 147  | 389   | 116  | 0.36   | 17    | 25   | 361   | 117  | 0.05   | ribosomal protein L13 homolog                      |
| 18235_at   | At1g27020 | 127   | 135  | 361   | 127  | 0.35   | 142   | 71   | 540   | 88   | 0.26   | unknown protein                                    |
| 16896_s_at | At2g41260 | 929   | 956  | 3092  | 889  | 0.33   | 933   | 594  | 3008  | 154  | 0.31   | late embryogenesis abundant M17 protein            |
| 19548_at   | At2g15050 | 121   | 134  | 447   | 81   | 0.27   | 91    | 98   | 388   | 93   | 0.24   | putative lipid transfer protein                    |
| 19051_at   | At2g36970 | 42    | 26   | 159   | 76   | 0.26   | 117   | 61   | 237   | 28   | 0.49   | putative glucosyltransferase                       |
| 17572_s_at | At1g64780 | 161   | 279  | 668   | 96   | 0.24   | 189   | 244  | 1147  | 155  | 0.16   | ammonium transporter, putative                     |
| 19720_at   | At1g22690 | -27   | 96   | -208  | 52   | 0.13   | -27   | 45   | -159  | 40   | 0.17   | putative gibberellin-regulated protein             |
| 12869_s_at | At4g11880 | 55    | 75   | -81   | 29   | -0.68  | 22    | 72   | -130  | 51   | -0.17  | MADS-box protein AGL14                             |
| 17024_s_at | At1g64900 | 48    | 56   | -59   | 65   | -0.81  | 319   | 64   | 12    | 57   | 27.72  | cytochrome p450, putative                          |
| 13231_at   | At1g32210 | 49    | 57   | -52   | 45   | -0.94  | -7    | 16   | 88    | 25   | -0.07  | defender against cell death protein, putative      |
| 19794_at   | At2g45490 | 81    | 89   | -71   | 26   | -1.14  | 39    | 46   | -69   | 34   | -0.56  | putative protein kinase                            |
| 16699_at   | At2g31100 | 48    | 12   | -34   | 55   | -1.44  | -62   | 28   | 21    | 9    | -2.96  | putative lipase                                    |
| 18204_at   | At4g35030 | 40    | 4    | -15   | 21   | -2.69  | -25   | 32   | 46    | 39   | -0.54  | protein kinase - like                              |
| 17953_at   | At4g01480 | 265   | 184  | -46   | 49   | -5.8   | 136   | 153  | -128  | 98   | -1.07  | putative inorganic phosphatase                     |
| 16034_at   | At1g32060 | 285   | 45   | -10   | 131  | -29.23 | 428   | 72   | -39   | 147  | -10.97 | phosphoribulokinase precursor                      |

Table 2. Genes that exhibit uniconazole-P-dependent transcription based on the criteria (Pkl vs. Upkl  $p < 0.05$  Wt vs. Uwt  $p < 0.05$ )

Wt=Wild type, Pkl= pickle mutant, Uwt=uniconazole-P treated wild type, Upkl= uniconazole-P treated pickle mutant  
 Mean = mean value for a given treatment, SD= standard deviation of the mean for a given treatment  
 Ratios are given for specific treatment comparisons and Data was sorted by the ratio of Uwt/Wt  
 This data set contains 69 genes

| Affy Code  | AGI Code  | Wt Mean  | Wt SD   | Uwt Mean | UwtSD   | p value<br>Wt v Uwt | Uwt/Wt | Pkl Mean | Pkl SD  | Upkl Mean | Upkl SD | p value<br>Pkl v Upkl | Upkl/Pkl | Putative Identification                             |
|------------|-----------|----------|---------|----------|---------|---------------------|--------|----------|---------|-----------|---------|-----------------------|----------|-----------------------------------------------------|
| 12788_at   | At1g23130 | -15.75   | 19.31   | -105.00  | 18.20   | 5.00E-04            | 6.67   | -44.50   | 38.42   | -126.75   | 25.25   | 1.20E-02              | 2.85     | unknown protein                                     |
| 13822_s_at | At2g31540 | -20.75   | 28.92   | -137.00  | 53.20   | 8.60E-03            | 6.60   | -166.50  | 51.18   | -16.25    | 52.65   | 6.00E-03              | 0.10     | putative GDSL-motif lipase hydrolase                |
| 20027_at   | At1g50420 | 170.75   | 113.54  | 911.50   | 157.05  | 3.00E-04            | 5.34   | 201.25   | 31.47   | 1347.00   | 187.30  | 0.00E+00              | 6.69     | scarecrow-like 3                                    |
| 19085_at   | At2g37060 | 65.75    | 61.55   | 200.25   | 23.64   | 6.50E-03            | 3.05   | 111.25   | 19.26   | 23.00     | 38.45   | 6.00E-03              | 0.21     | putative CCAAT-box binding transcription factor     |
| 17739_at   | At5g51810 | 173.00   | 78.97   | 518.50   | 216.37  | 2.40E-02            | 3.00   | 328.75   | 76.87   | 1520.75   | 230.88  | 0.00E+00              | 4.63     | gibberellin 20-oxidase (emb CAA58294.1)             |
| 17299_s_at | At4g25420 | 165.75   | 111.82  | 495.50   | 94.62   | 4.10E-03            | 2.99   | 185.25   | 76.37   | 850.00    | 248.67  | 2.00E-03              | 4.59     | gibberellin 20-oxidase - Arabidopsis thaliana       |
| 13516_at   | At4g18690 | 112.25   | 75.01   | 286.50   | 103.36  | 3.42E-02            | 2.55   | 215.25   | 104.35  | 594.50    | 107.61  | 2.00E-03              | 2.76     | putative protein                                    |
| 12368_at   | At5g07200 | 1413.25  | 500.10  | 3386.00  | 381.23  | 8.00E-04            | 2.40   | 525.25   | 442.45  | 3780.25   | 252.68  | 0.00E+00              | 7.20     | gibberellin 20-oxidase                              |
| 12103_at   | At1g20890 | 98.25    | 85.38   | 233.50   | 65.37   | 4.56E-02            | 2.38   | 178.50   | 66.92   | 275.00    | 39.21   | 4.70E-02              | 1.54     | unknown protein                                     |
| 18350_at   | At4g35390 | 194.00   | 95.84   | 401.75   | 120.53  | 3.57E-02            | 2.07   | 156.25   | 61.86   | 352.75    | 119.50  | 2.70E-02              | 2.26     | putative protein                                    |
| 19683_at   | At1g62500 | 302.75   | 85.06   | 596.25   | 80.72   | 2.40E-03            | 1.97   | 653.50   | 110.00  | 1616.50   | 470.66  | 7.00E-03              | 2.47     | putative proline-rich cell wall protein (pir IS529) |
| 12881_s_at | NULL      | 1124.00  | 103.71  | 2160.25  | 633.69  | 1.80E-02            | 1.92   | 1676.50  | 299.81  | 2883.00   | 506.52  | 6.00E-03              | 1.72     | NULL                                                |
| 17549_at   | At1g15550 | 925.50   | 108.89  | 1739.00  | 273.95  | 1.50E-03            | 1.88   | 667.75   | 295.86  | 1986.75   | 254.00  | 1.00E-03              | 2.98     | gibberellin 3 beta-hydroxylase, putative            |
| 18439_s_at | At3g26570 | 729.50   | 117.12  | 1249.50  | 263.64  | 1.13E-02            | 1.71   | 855.25   | 182.03  | 1246.00   | 192.99  | 2.60E-02              | 1.46     | phosphate transporter, putative                     |
| 17310_at   | At3g51810 | 2999.00  | 413.49  | 5033.00  | 874.08  | 5.60E-03            | 1.68   | 3032.25  | 277.66  | 8118.00   | 501.98  | 0.00E+00              | 2.66     | embryonic abundant protein AtEm1                    |
| 14097_at   | At2g47770 | 1482.00  | 161.84  | 2325.50  | 149.13  | 3.00E-04            | 1.57   | 1469.75  | 103.53  | 2940.50   | 576.17  | 2.00E-03              | 3.00     | unknown protein                                     |
| 20375_at   | At1g48130 | 793.00   | 198.58  | 1198.00  | 238.12  | 4.00E-02            | 1.51   | 764.75   | 86.84   | 2787.25   | 827.11  | 3.00E-03              | 2.64     | peroxidoxin                                         |
| 12752_s_at | At4g21960 | 1191.25  | 290.70  | 1794.00  | 388.23  | 4.74E-02            | 1.51   | 1693.75  | 205.16  | 2839.50   | 368.73  | 2.00E-03              | 1.68     | peroxidase prx1                                     |
| 12538_at   | At1g11580 | 4539.00  | 1366.07 | 6614.25  | 872.36  | 4.29E-02            | 1.46   | 4418.00  | 736.67  | 6599.25   | 394.86  | 2.00E-03              | 1.49     | pectin methyltransferase, putative                  |
| 17255_at   | At2g25980 | 1142.00  | 174.10  | 1645.25  | 285.60  | 2.37E-02            | 1.44   | 1901.00  | 370.55  | 2686.50   | 233.84  | 1.20E-02              | 1.41     | similar to jasmonate-inducible proteins from Brass  |
| 18022_at   | At5g40760 | 219.25   | 44.66   | 315.50   | 49.18   | 2.74E-02            | 1.44   | 281.25   | 77.89   | 436.50    | 74.74   | 2.80E-02              | 1.55     | glucose-6-phosphate dehydrogenase                   |
| 15068_at   | At2g29660 | 510.00   | 98.86   | 732.50   | 69.19   | 1.02E-02            | 1.44   | 469.00   | 126.16  | 644.75    | 49.56   | 4.10E-02              | 1.37     | unknown protein                                     |
| 17038_s_at | At2g36640 | 707.00   | 84.83   | 1011.50  | 119.58  | 6.00E-03            | 1.43   | 519.25   | 63.02   | 841.00    | 202.00  | 2.30E-02              | 1.62     | late embryogenesis abundant protein (ATECP63)       |
| 16503_at   | At5g35630 | 311.75   | 79.96   | 443.00   | 50.23   | 3.20E-02            | 1.42   | 425.00   | 181.21  | 797.50    | 108.61  | 1.20E-02              | 1.88     | glutamate-ammonia ligase (EC 6.3.1.2) precursor, c  |
| 12777_i_at | At1g54000 | 12508.25 | 994.29  | 17700.25 | 2732.06 | 1.18E-02            | 1.42   | 14460.25 | 2208.00 | 21379.75  | 3780.66 | 2.00E-02              | 1.48     | myrosinase-associated protein, putative             |
| 12459_i_at | At2g15400 | 613.50   | 87.24   | 849.50   | 168.76  | 4.75E-02            | 1.38   | 618.50   | 111.37  | 867.75    | 51.89   | 7.00E-03              | 1.40     | DNA-directed RNA polymerase II, third largest subu  |
| 15131_s_at | At1g28330 | 2919.50  | 367.98  | 4002.00  | 323.10  | 4.50E-03            | 1.37   | 3133.25  | 415.69  | 4790.25   | 538.84  | 3.00E-03              | 1.53     | dormancy-associated protein, putative               |
| 16598_s_at | At1g70370 | 1325.25  | 221.15  | 1752.50  | 201.98  | 2.91E-02            | 1.32   | 1956.75  | 178.51  | 2440.50   | 136.00  | 5.00E-03              | 1.25     | aromatic rich glycoprotein, putative                |
| 18872_at   | At3g17520 | 1759.50  | 152.95  | 2285.50  | 282.54  | 1.69E-02            | 1.30   | 1473.75  | 199.83  | 2457.00   | 414.06  | 5.00E-03              | 1.67     | unknown protein                                     |
| 18073_g_at | At4g03280 | 1719.00  | 183.47  | 2216.75  | 249.11  | 1.82E-02            | 1.29   | 2037.25  | 238.35  | 2459.25   | 204.29  | 3.60E-02              | 1.21     | putative component of cytochrome B6-F complex       |
| 15938_at   | At4g33100 | 289.25   | 43.58   | 373.00   | 33.93   | 2.30E-02            | 1.29   | 414.25   | 137.07  | 222.50    | 45.67   | 3.80E-02              | 0.54     | putative protein                                    |
| 15949_s_at | At2g39730 | 686.00   | 44.50   | 883.00   | 70.80   | 3.30E-03            | 1.29   | 724.50   | 59.43   | 1025.75   | 166.96  | 1.50E-02              | 1.42     | hypothetical protein                                |
| 16168_s_at | At2g14260 | 709.00   | 81.41   | 904.75   | 84.99   | 1.59E-02            | 1.28   | 572.25   | 212.81  | 970.50    | 191.70  | 3.20E-02              | 1.70     | proline iminopeptidase                              |
| 17568_at   | At3g25860 | 2080.00  | 267.75  | 2619.50  | 236.01  | 2.33E-02            | 1.26   | 2199.50  | 159.03  | 2543.50   | 30.70   | 5.00E-03              | 1.16     | dihydroliipoamide S-acetyltransferase               |
| 16009_s_at | At2g47730 | 1962.25  | 212.82  | 2435.50  | 315.65  | 4.74E-02            | 1.24   | 3089.50  | 678.65  | 4435.75   | 735.10  | 3.60E-02              | 1.44     | glutathione S-transferase (GST6)                    |
| 18685_at   | At4g30950 | 2799.00  | 69.69   | 3455.25  | 474.10  | 3.38E-02            | 1.23   | 2919.75  | 239.95  | 3338.50   | 222.86  | 4.30E-02              | 1.14     | chloroplast omega-6 fatty acid desaturase (fad6)    |
| 13629_s_at | At2g38120 | 3446.00  | 194.36  | 2970.25  | 312.81  | 4.16E-02            | 0.86   | 2912.75  | 492.58  | 2188.75   | 201.13  | 3.50E-02              | 0.75     | unknown protein                                     |
| 18946_at   | At5g39580 | 8397.00  | 774.42  | 6730.75  | 563.51  | 1.31E-02            | 0.80   | 8011.50  | 1063.13 | 6401.50   | 482.43  | 3.30E-02              | 0.80     | peroxidase ATP24a                                   |
| 18706_s_at | At2g14750 | 2307.75  | 153.96  | 1822.00  | 133.03  | 3.10E-03            | 0.79   | 2629.00  | 197.13  | 2103.50   | 218.02  | 1.20E-02              | 0.80     | putative adenosine phosphosulfate kinase            |
| 16495_at   | At5g66040 | 3410.25  | 400.37  | 2614.75  | 85.50   | 8.10E-03            | 0.77   | 4480.25  | 778.84  | 2940.50   | 292.40  | 1.00E-02              | 0.66     | senescence-associated protein                       |
| 15194_s_at | At5g15230 | 14574.25 | 2532.56 | 11060.00 | 822.55  | 3.86E-02            | 0.76   | 18371.50 | 4589.06 | 10965.25  | 1324.82 | 2.10E-02              | 0.76     | GASA4                                               |
| 19459_at   | At4g36880 | 37492.25 | 4168.40 | 28158.00 | 5808.82 | 4.01E-02            | 0.75   | 37121.75 | 5522.94 | 28046.00  | 3444.45 | 3.20E-02              | 0.60     | cysteine proteinase                                 |
| 16087_s_at | At3g08730 | 1918.00  | 342.17  | 1422.00  | 105.25  | 3.24E-02            | 0.74   | 1704.50  | 87.87   | 1190.75   | 143.89  | 1.00E-03              | 0.70     | putative ribosomal-protein S6 kinase (ATPK6)        |
| 12523_at   | At1g69530 | 52336.75 | 5313.38 | 38006.25 | 7107.05 | 1.79E-02            | 0.73   | 41144.25 | 7919.06 | 27232.00  | 4673.30 | 2.30E-02              | 0.66     | expansin (At-EXP1)                                  |
| 20156_at   | At3g52470 | 6960.50  | 596.30  | 5017.50  | 719.51  | 6.00E-03            | 0.72   | 9267.25  | 1169.20 | 6915.75   | 609.90  | 1.20E-02              | 0.75     | putative protein                                    |
| 20605_at   | At1g27150 | 527.50   | 104.13  | 376.75   | 34.06   | 3.32E-02            | 0.71   | 482.25   | 33.77   | 375.75    | 66.97   | 3.00E-02              | 0.78     | unknown protein                                     |
| 18339_at   | At4g01450 | 3611.50  | 615.34  | 2541.75  | 227.21  | 1.72E-02            | 0.70   | 3453.25  | 406.14  | 2153.75   | 424.53  | 4.00E-03              | 0.62     | predicted protein of unknown function               |
| 15483_s_at | At2g46650 | 1421.50  | 67.88   | 948.50   | 106.66  | 3.00E-04            | 0.67   | 1824.00  | 223.90  | 1243.50   | 234.60  | 1.20E-02              | 0.68     | putative cytochrome b5                              |
| 14019_at   | At2g17280 | 1411.25  | 125.88  | 934.00   | 232.84  | 1.13E-02            | 0.66   | 1215.25  | 235.71  | 724.25    | 96.11   | 8.00E-03              | 0.60     | unknown protein                                     |
| 15355_at   | At4g21560 | 1527.00  | 310.76  | 997.50   | 220.99  | 3.21E-02            | 0.65   | 1168.50  | 79.58   | 962.00    | 85.86   | 1.20E-02              | 0.82     | putative protein                                    |
| 14620_at   | At5g17990 | 684.00   | 115.45  | 444.75   | 132.19  | 3.44E-02            | 0.65   | 592.50   | 52.11   | 439.25    | 81.34   | 1.90E-02              | 0.74     | anthranilate phosphoribosyltransferase, chloroplas  |
| 19737_at   | At1g01580 | 478.75   | 33.34   | 309.75   | 95.30   | 1.55E-02            | 0.65   | 527.50   | 94.09   | 737.00    | 77.71   | 1.40E-02              | 1.40     | hypothetical protein                                |
| 20487_at   | At4g34810 | 826.75   | 110.02  | 525.50   | 59.16   | 2.90E-03            | 0.64   | 1030.75  | 249.16  | 619.75    | 131.55  | 2.70E-02              | 0.60     | putative protein                                    |
| 16438_at   | At1g03870 | 3353.75  | 701.33  | 2127.50  | 650.53  | 4.27E-02            | 0.63   | 3869.00  | 425.81  | 2979.00   | 411.69  | 2.40E-02              | 0.77     | unknown protein                                     |
| 17577_g_at | At1g23080 | 1101.75  | 235.69  | 689.50   | 60.79   | 1.47E-02            | 0.63   | 1377.50  | 213.70  | 966.75    | 181.42  | 3.20E-02              | 0.72     | putative auxin transport protein                    |
| 13793_at   | At4g26790 | 852.25   | 137.18  | 530.75   | 107.10  | 1.02E-02            | 0.62   | 820.25   | 91.08   | 575.50    | 138.33  | 2.50E-02              | 0.70     | putative APG protein                                |
| 12150_at   | At2g44080 | 822.75   | 58.05   | 504.75   | 133.42  | 4.70E-03            | 0.61   | 1002.50  | 209.27  | 541.00    | 51.27   | 5.00E-03              | 0.54     | unknown protein                                     |
| 15997_s_at | At1g20440 | 6094.50  | 1295.56 | 3679.00  | 657.63  | 1.59E-02            | 0.60   | 8179.75  | 1594.37 | 5439.25   | 417.41  | 1.60E-02              | 0.66     | hypothetical protein                                |
| 17960_at   | At1g65310 | 726.75   | 270.26  | 321.25   | 71.18   | 2.73E-02            | 0.44   | 1121.75  | 204.27  | 539.25    | 120.31  | 3.00E-03              | 0.48     | xyloglucan endotransglycosylase, putative           |
| 12512_at   | At2g44220 | 219.25   | 42.16   | 82.75    | 54.87   | 7.60E-03            | 0.38   | 60.25    | 36.47   | 139.75    | 35.40   | 2.00E-02              | 2.32     | hypothetical protein                                |
| 19565_at   | At3g02885 | 732.25   | 217.48  | 221.25   | 127.37  | 6.70E-03            | 0.30   | 590.50   | 216.52  | 264.50    | 154.75  | 5.00E-02              | 0.45     | Expressed protein                                   |
| 16440_at   | At2g40000 | 275.00   | 112.09  | 80.50    | 90.61   | 3.56E-02            | 0.29   | 280.50   | 76.97   | 132.25    | 68.66   | 2.80E-02              | 0.47     | putative nematode-resistance protein                |
| 14413_at   | At4g02860 | 145.50   | 23.56   | 39.25    | 53.69   | 1.10E-02            | 0.27   | 82.50    | 80.43   | 209.00    | 21.62   | 2.30E-02              | 2.53     | putative protein                                    |
| 13854_at   | At2g28830 | 125.00   | 28.25   | 3.25     | 40.48   | 2.60E-03            | 0.03   | 68.25    | 42.90   | -21.75    | 30.38   | 1.40E-02              | -0.32    | hypothetical protein                                |
| 16231_at   | At3g57730 | 74.50    | 52.36   | -35.00   | 60.96   | 3.44E-02            | -0.47  | -9.00    | 78.03   | 153.00    | 73.72   | 2.30E-02              | -17.00   | putative protein                                    |
| 16699_at   | At2g31100 | -33.50   | 11.73   | 20.75    | 28.24   | 1.21E-02            | -0.62  | 48.25    | 54.96   | -61.50    | 9.47    | 8.00E-03              | -1.27    | putative lipase                                     |
| 18204_at   | At4g35030 | -14.75   | 4.27    | 45.50    | 31.72   | 9.30E-03            | -3.08  | 39.75    | 20.58   | -24.75    | 39.08   | 2.70E-02              | -0.62    | protein kinase - like                               |
| 18848_at   | At2g01840 | -24.00   | 79.03   | 90.75    | 43.57   | 4.39E-02            | -3.78  | 8.50     | 37.19   | 79.25     | 39.51   | 4.00E-02              | 9.32     | putative non-LTR retroelement reverse transcriptas  |
| 15298_at   | At2g04810 | -19.00   | 60.04   | 180.25   | 123.80  | 2.75E-02            | -9.49  | -80.50   | 56.60   | 52.50     | 71.29   | 2.70E-02              | -0.65    | hypothetical                                        |

Table 3. Genes that exhibit uniconazole-P-dependent and *PKL*-dependent transcription based on the criteria (Wt vs. Upkl  $p < 0.05$   $\square$  Pkl vs. Upkl  $p < 0.05$   $\square$  Uwt vs. Upkl  $p < 0.05$ ).

Wt=Wild type, Pkl= pickle mutant, Uwt=uniconazole-P treated wild type, Upkl= uniconazole-P treated pickle mutant  
Mean = mean value for a given treatment, SD= standard deviation of the mean for a given treatment  
Ratios are given for specific treatment comparisons and Data was sorted by the ratio of Upkl/Pkl  
There are 88 genes here

| Affy Code  | AGI Code  | Pkl Mean | Pkl SD  | Wt Mean  | Wt SD   | Upkl Mean | Upkl SD | Uwt Mean | Uwt SD  | p value<br>pkl v Upkl | p value<br>Upkl v Wt | p value<br>Upkl v Uwt | Upkl/Wt | Upkl/Pkl | Upkl/Uwt | Putative Identification                               |
|------------|-----------|----------|---------|----------|---------|-----------|---------|----------|---------|-----------------------|----------------------|-----------------------|---------|----------|----------|-------------------------------------------------------|
| 17024_s_at | At1g64900 | 47.50    | 64.54   | -58.75   | 55.83   | 318.75    | 56.59   | 11.50    | 63.98   | 7.82E-04              | 8.10E-05             | 4.33E-04              | -5.43   | 6.71     | 27.72    | cytochrome p450, putative                             |
| 20027_at   | At1g50420 | 201.25   | 31.47   | 170.75   | 113.54  | 1347.00   | 187.30  | 911.50   | 157.05  | 5.10E-06              | 2.58E-05             | 1.09E-02              | 7.89    | 6.69     | 1.48     | scarecrow-like 3                                      |
| 13449_at   | At4g36700 | 215.00   | 60.23   | 179.50   | 86.16   | 1206.00   | 204.91  | 357.75   | 226.70  | 3.77E-05              | 4.77E-05             | 1.60E-03              | 6.72    | 5.61     | 3.37     | globulin-like protein                                 |
| 17739_at   | At5g51810 | 328.75   | 76.87   | 173.00   | 78.97   | 1520.75   | 230.88  | 518.50   | 216.37  | 2.77E-05              | 1.29E-05             | 9.35E-04              | 8.79    | 4.63     | 2.93     | gibberellin 20-oxidase (emb CAA58294.1)               |
| 17299_s_at | At4g25420 | 185.25   | 76.37   | 165.75   | 111.82  | 850.00    | 248.67  | 495.50   | 94.62   | 1.41E-03              | 1.83E-03             | 3.52E-02              | 5.13    | 4.59     | 1.72     | gibberellin 20-oxidase - Arabidopsis thaliana         |
| 19031_at   | At2g10010 | -32.00   | 41.43   | -6.00    | 35.92   | -131.00   | 16.99   | -54.75   | 28.95   | 4.13E-03              | 6.83E-04             | 3.71E-03              | 21.83   | 4.09     | 2.39     | putative TNP2-like transposon protein                 |
| 15280_at   | At2g19900 | 109.00   | 52.31   | 108.00   | 41.85   | 409.00    | 73.48   | 165.50   | 100.88  | 4.76E-04              | 3.03E-04             | 6.01E-03              | 3.79    | 3.75     | 2.47     | malate oxidoreductase (malic enzyme)                  |
| 20347_s_at | At1g48130 | 764.75   | 86.84   | 793.00   | 198.58  | 2787.25   | 827.11  | 1198.00  | 238.12  | 7.53E-04              | 1.17E-03             | 5.55E-03              | 3.51    | 3.64     | 2.33     | peroxiredoxin                                         |
| 17282_s_at | At3g51810 | 642.50   | 96.62   | 726.25   | 136.65  | 1957.25   | 135.52  | 820.25   | 206.52  | 3.98E-06              | 1.87E-05             | 9.93E-04              | 2.70    | 3.05     | 2.39     | embryonic abundant protein AtEm1                      |
| 20196_at   | At1g08630 | 124.25   | 116.72  | 59.50    | 44.43   | 343.75    | 51.59   | 133.75   | 106.38  | 1.48E-02              | 1.62E-04             | 1.24E-02              | 5.78    | 2.77     | 2.57     | unknown protein                                       |
| 13516_at   | At4g18690 | 215.25   | 104.35  | 112.25   | 75.01   | 594.50    | 107.61  | 286.50   | 103.36  | 2.47E-03              | 2.97E-04             | 6.76E-03              | 5.30    | 2.76     | 2.08     | putative protein                                      |
| 15708_at   | At2g34700 | 91.00    | 64.82   | 63.00    | 43.38   | 251.25    | 67.89   | 108.25   | 61.28   | 1.48E-02              | 3.35E-03             | 2.14E-02              | 3.99    | 2.76     | 2.32     | putative proline-rich glycoprotein                    |
| 17310_at   | At3g51810 | 3032.25  | 277.66  | 2999.00  | 413.49  | 8118.00   | 501.98  | 5033.00  | 874.08  | 1.50E-06              | 7.91E-06             | 1.23E-03              | 2.71    | 2.68     | 1.61     | embryonic abundant protein AtEm1                      |
| 19683_at   | At1g62500 | 653.50   | 110.00  | 302.75   | 85.06   | 1616.50   | 470.66  | 596.25   | 80.72   | 3.77E-03              | 4.72E-04             | 2.39E-03              | 5.34    | 2.47     | 2.71     | putative proline-rich cell wall protein (pir IS529)   |
| 20535_at   | At2g28490 | 819.00   | 137.65  | 681.50   | 122.40  | 1992.50   | 73.10   | 836.50   | 143.90  | 1.37E-05              | 4.26E-06             | 1.54E-05              | 2.92    | 2.43     | 2.38     | putative seed storage protein (vicilin-like)          |
| 18714_at   | At5g51210 | 1464.75  | 618.94  | 1163.00  | 428.04  | 3543.75   | 823.25  | 1894.75  | 586.95  | 6.09E-03              | 1.10E-03             | 1.36E-02              | 3.05    | 2.42     | 1.87     | oleosin-like                                          |
| 16025_s_at | At4g28520 | 3845.50  | 740.86  | 5050.75  | 588.94  | 9036.75   | 891.59  | 5007.75  | 807.57  | 1.36E-04              | 2.52E-04             | 6.17E-04              | 1.79    | 2.35     | 1.80     | 12S cruciferin seed storage protein                   |
| 19979_at   | At1g67330 | 542.50   | 317.16  | 54.50    | 143.53  | 1132.25   | 308.13  | -13.00   | 76.03   | 4.28E-02              | 3.58E-04             | 9.29E-05              | 20.78   | 2.09     | -87.10   | unknown protein                                       |
| 13199_r_at | NULL      | 7591.25  | 665.41  | 7691.75  | 560.11  | 15518.25  | 2423.02 | 9914.00  | 2824.89 | 2.52E-04              | 2.27E-04             | 2.31E-02              | 2.02    | 2.04     | 1.57     | NULL                                                  |
| 15117_at   | At1g44575 | 710.25   | 465.40  | 418.75   | 342.64  | 1420.50   | 305.36  | 436.75   | 164.46  | 5.98E-02              | 8.12E-03             | 9.95E-04              | 3.39    | 2.00     | 3.25     | photosystem II 22kDa protein, putative                |
| 16974_at   | At4g15160 | 2427.25  | 264.78  | 1492.00  | 692.82  | 4823.00   | 324.41  | 1987.00  | 207.32  | 2.35E-05              | 4.09E-04             | 6.03E-06              | 3.23    | 1.99     | 4.23     | cell wall protein like                                |
| 16503_at   | At5g35630 | 425.00   | 181.21  | 311.75   | 79.96   | 797.50    | 108.61  | 443.00   | 50.23   | 1.56E-02              | 2.98E-04             | 7.42E-04              | 2.56    | 1.88     | 1.80     | glutamate-ammonia ligase (EC 6.3.1.2) precursor, c    |
| 19127_at   | At2g03750 | 257.50   | 71.86   | 145.50   | 54.76   | 481.00    | 109.47  | 190.00   | 59.54   | 1.29E-02              | 1.15E-03             | 2.78E-03              | 3.31    | 1.87     | 2.53     | putative steroid sulfotransferase                     |
| 17775_at   | At1g61800 | 2764.50  | 190.45  | 2447.75  | 294.64  | 5045.75   | 532.83  | 2628.75  | 743.86  | 1.06E-04              | 1.03E-04             | 4.28E-03              | 2.06    | 1.83     | 1.92     | glucose-6-phosphate phosphate-translocator precursor  |
| 20321_s_at | At1g73190 | 3291.00  | 406.59  | 2120.50  | 562.91  | 5887.00   | 413.58  | 1850.25  | 136.11  | 1.29E-04              | 9.70E-05             | 5.03E-07              | 2.78    | 1.79     | 3.18     | tonoplast intrinsic protein, alpha (alpha-TIP)        |
| 16053_l_at | At1g02920 | 1185.75  | 272.13  | 860.75   | 402.76  | 2000.75   | 202.18  | 636.00   | 165.74  | 4.11E-03              | 4.02E-03             | 4.96E-05              | 2.32    | 1.69     | 3.15     | glutathione S-transferase, putative                   |
| 15199_s_at | At5g20960 | 3567.75  | 1182.36 | 3658.50  | 777.77  | 6017.25   | 551.02  | 4327.25  | 903.79  | 1.33E-02              | 6.10E-03             | 2.27E-02              | 1.56    | 1.69     | 1.39     | aldehyde oxidase AAO1                                 |
| 19217_at   | At1g05510 | 484.25   | 87.40   | 303.50   | 108.82  | 815.25    | 144.79  | 184.25   | 91.53   | 5.09E-03              | 1.21E-03             | 2.57E-04              | 2.69    | 1.68     | 4.42     | hypothetical protein                                  |
| 12752_s_at | At4g21960 | 1693.75  | 205.16  | 1191.25  | 290.70  | 2839.50   | 368.73  | 1794.00  | 388.23  | 1.33E-03              | 3.86E-04             | 8.26E-03              | 2.38    | 1.68     | 1.58     | peroxidase prx1                                       |
| 13218_s_at | At1g20620 | 1785.00  | 363.66  | 1140.50  | 221.51  | 2985.25   | 358.80  | 995.00   | 291.09  | 4.37E-03              | 1.11E-04             | 2.07E-04              | 2.62    | 1.67     | 3.00     | catalsase 3                                           |
| 18991_s_at | At3g27660 | 3497.00  | 317.99  | 2173.25  | 976.01  | 5718.75   | 475.76  | 1509.00  | 169.73  | 1.95E-04              | 1.36E-03             | 9.51E-07              | 2.63    | 1.64     | 3.79     | oleosin isoform                                       |
| 15965_at   | At3g16460 | 2535.50  | 932.97  | 1163.25  | 848.34  | 4134.50   | 652.73  | 1265.25  | 117.79  | 4.84E-02              | 2.37E-03             | 2.59E-05              | 3.56    | 1.63     | 3.27     | putative lectin                                       |
| 19839_at   | At2g28790 | 7118.50  | 836.81  | 5137.00  | 1096.72 | 11500.00  | 1782.90 | 5629.75  | 1194.50 | 2.49E-03              | 5.77E-04             | 1.47E-03              | 2.24    | 1.62     | 2.04     | putative thaumatin                                    |
| 15198_at   | At1g76090 | 735.75   | 99.57   | 604.75   | 86.08   | 1183.50   | 52.95   | 642.50   | 149.31  | 1.85E-04              | 3.94E-05             | 7.29E-04              | 1.96    | 1.61     | 1.84     | S-adenosyl-methionine-sterol-C-methyltransferase,     |
| 13144_at   | At2g35860 | 536.75   | 109.55  | 467.00   | 122.49  | 855.25    | 107.46  | 570.25   | 166.44  | 6.53E-03              | 3.39E-03             | 3.21E-02              | 1.83    | 1.59     | 1.50     | unknown protein                                       |
| 14018_at   | At1g09750 | 2413.50  | 372.18  | 1289.50  | 468.52  | 3801.50   | 204.31  | 1449.50  | 101.56  | 9.65E-04              | 2.11E-04             | 4.65E-07              | 2.95    | 1.58     | 2.62     | hypothetical protein                                  |
| 15451_at   | At5g64620 | 2230.75  | 246.26  | 1482.00  | 199.20  | 3496.75   | 522.33  | 1727.50  | 215.41  | 3.65E-03              | 1.81E-04             | 4.52E-04              | 2.36    | 1.57     | 2.02     | invertase inhibitor homolog (emb CAA73335.1)          |
| 13573_at   | At4g37550 | 1037.25  | 96.47   | 765.50   | 100.92  | 1625.00   | 301.30  | 974.75   | 200.97  | 3.67E-03              | 8.22E-04             | 9.61E-03              | 2.12    | 1.57     | 1.67     | formamidase - like protein                            |
| 18022_at   | At5g40760 | 281.25   | 77.89   | 219.25   | 44.66   | 436.50    | 74.74   | 315.50   | 49.18   | 2.76E-02              | 2.21E-03             | 3.47E-02              | 1.99    | 1.55     | 1.38     | glucose-6-phosphate dehydrogenase                     |
| 17492_at   | At1g80340 | 2862.00  | 391.24  | 2336.75  | 378.98  | 4379.25   | 266.10  | 2578.00  | 552.08  | 1.14E-03              | 2.32E-04             | 1.64E-03              | 1.87    | 1.53     | 1.70     | gibberellin 3 beta-hydroxylase                        |
| 15131_s_at | At1g28330 | 3133.25  | 415.69  | 2919.50  | 367.98  | 4790.25   | 537.84  | 4002.00  | 323.10  | 2.56E-03              | 9.76E-04             | 4.29E-02              | 1.64    | 1.53     | 1.20     | domoyancy-associated protein, putative                |
| 16575_s_at | At5g40420 | 4969.00  | 903.06  | 4006.00  | 360.50  | 7588.75   | 678.57  | 4059.00  | 1444.84 | 4.72E-03              | 5.13E-05             | 8.91E-03              | 1.89    | 1.53     | 1.87     | oleosin                                               |
| 18560_at   | At1g62510 | 9129.00  | 1087.94 | 7810.25  | 1504.38 | 13928.50  | 1913.00 | 8850.50  | 1451.99 | 4.11E-03              | 2.49E-03             | 6.62E-03              | 1.78    | 1.53     | 1.57     | similar to 14kD proline-rich protein DC2.15 precursor |
| 20383_at   | At2g26640 | 280.50   | 58.60   | 205.75   | 70.73   | 424.25    | 37.29   | 173.50   | 137.87  | 6.51E-03              | 1.78E-03             | 1.64E-02              | 2.06    | 1.51     | 2.45     | putative beta-ketocacyl-CoA synthase                  |
| 20155_s_at | At4g26130 | 794.25   | 76.03   | 492.00   | 142.11  | 1180.25   | 193.81  | 371.00   | 122.40  | 8.87E-03              | 1.15E-03             | 3.60E-04              | 2.40    | 1.49     | 3.18     | uncharacterized protein                               |
| 12171_at   | At3g52500 | 1352.50  | 152.12  | 1025.50  | 194.34  | 1976.75   | 165.63  | 936.75   | 58.12   | 1.46E-03              | 3.48E-04             | 1.14E-05              | 1.93    | 1.46     | 2.11     | expressed protein                                     |
| 13621_g_at | At4g37560 | 614.50   | 126.21  | 661.25   | 65.27   | 896.50    | 34.65   | 655.00   | 72.83   | 5.85E-03              | 9.71E-04             | 1.11E-03              | 1.36    | 1.46     | 1.37     | formamidase - like protein                            |
| 17543_s_at | At5g25900 | 2881.00  | 414.91  | 2780.00  | 387.47  | 4170.25   | 312.57  | 3264.50  | 348.21  | 3.22E-03              | 1.82E-03             | 8.12E-03              | 1.50    | 1.45     | 1.28     | cytochrome P450 GA3                                   |
| 16288_at   | At2g17220 | 551.00   | 69.49   | 303.75   | 57.42   | 796.50    | 51.44   | 391.25   | 64.37   | 1.41E-03              | 1.59E-05             | 7.64E-05              | 2.62    | 1.45     | 2.04     | putative prolyl 4-hydroxylase, alpha subunit          |
| 16009_s_at | At2g47730 | 3089.50  | 678.65  | 1962.25  | 212.82  | 4435.75   | 735.10  | 2435.50  | 315.65  | 4.50E-02              | 3.25E-04             | 1.88E-03              | 2.26    | 1.44     | 1.82     | glutathione S-transferase (GST6)                      |
| 20341_at   | At2g29750 | 314.00   | 78.27   | 300.25   | 26.32   | 447.75    | 55.73   | 257.50   | 121.66  | 1.89E-02              | 2.81E-03             | 3.18E-02              | 1.48    | 1.43     | 1.74     | putative flavonol 3-O-glucosyltransferase             |
| 17255_at   | At2g25980 | 1901.00  | 370.55  | 1142.00  | 174.10  | 2686.50   | 233.84  | 1645.25  | 285.60  | 1.52E-02              | 3.79E-05             | 1.45E-03              | 2.35    | 1.41     | 1.63     | similar to jasmonate-inducible proteins from Brass    |
| 19737_at   | At1g01580 | 527.50   | 94.09   | 478.75   | 33.34   | 737.00    | 77.71   | 309.75   | 95.30   | 1.45E-02              | 7.03E-04             | 5.57E-04              | 1.54    | 1.40     | 2.38     | hypothetical protein                                  |
| 14383_at   | At1g09460 | 322.00   | 63.10   | 82.00    | 157.82  | 446.25    | 47.55   | 84.75    | 188.39  | 2.07E-02              | 7.62E-03             | 1.30E-02              | 5.44    | 1.39     | 5.27     | unknown protein                                       |
| 16015_at   | At1g74470 | 1015.50  | 295.23  | 521.25   | 134.46  | 1404.50   | 115.95  | 502.50   | 102.21  | 6.27E-02              | 7.86E-05             | 2.67E-05              | 2.69    | 1.38     | 2.80     | geranylgeranyl reductase                              |
| 15983_at   | At4g27140 | 2190.50  | 441.42  | 884.25   | 778.65  | 2988.75   | 311.33  | 370.00   | 133.95  | 3.04E-02              | 4.19E-03             | 1.98E-06              | 3.38    | 1.36     | 8.08     | NWMI1 - 2S albumin 1 precursor                        |
| 12185_at   | At1g54860 | 844.75   | 148.42  | 613.75   | 155.59  | 1143.50   | 131.69  | 647.00   | 79.07   | 2.51E-02              | 2.07E-03             | 5.14E-04              | 1.86    | 1.35     | 1.77     | unknown protein                                       |
| 18311_at   | At1g53840 | 759.75   | 58.12   | 509.25   | 163.37  | 1025.75   | 105.40  | 433.50   | 29.54   | 4.16E-03              | 2.09E-03             | 2.18E-05              | 2.01    | 1.35     | 2.37     | pectinesterase, putative                              |
| 12792_s_at | At2g45180 | 20395.25 | 3719.83 | 15004.75 | 1239.28 | 26965.00  | 3530.13 | 15777.50 | 1365.51 | 4.80E-02              | 2.91E-04             | 5.06E-04              | 1.80    | 1.32     | 1.71     | unknown protein                                       |
| 13011_at   | At4g38430 | 961.25   | 142.40  | 776.00   | 53.25   | 1260.50   | 149.98  | 948.75   | 133.10  | 2.51E-02              | 5.76E-04             | 2.01E-02              | 1.62    | 1.31     | 1.33     | putative protein                                      |
| 18297_at   | At5g11720 | 499.25   | 93.88   | 348.50   | 111.51  | 650.75    | 76.93   | 258.2    |         |                       |                      |                       |         |          |          |                                                       |

Table 4. Primer information for qRT-PCR.

| Text Designation | Gene Name     | AGI Code  | Oligonucleotide Primer Sequences |                             | Primer number (JOPR###) |         | Concentrations Used (nM) |         |
|------------------|---------------|-----------|----------------------------------|-----------------------------|-------------------------|---------|--------------------------|---------|
|                  |               |           | Forward primer sequence          | Reverse primer sequence     | Forward                 | Reverse | Forward                  | Reverse |
| 18s ribosomal    | 18s ribosomal |           | TCCTAGTAAGCGCGAGTCATCA           | CGAACACTTCACCGGATCAT        | 862                     | 863     | 900                      | 900     |
| LEC1             | LEC1          | At1g21970 | AAGCCGGCATTCCGTTAAT              | GGTCGTCGGGTCAAGATGAA        | 868                     | 869     | 300                      | 50      |
| LEC2             | LEC2          | At1g28300 | CCATCCCTAACGATCTCATGGA           | TCATCGGATGAACCCACGTA        | 870                     | 871     | 300                      | 900     |
| ABI3             | ABI3          | At3g24650 | TTACCCACGTCGCTTTGCTT             | CAGGGATGGAAACCAGAAAAGA      | 877                     | 878     | 900                      | 300     |
| Unknown2         | At2g35810     | At2g35810 | CGGTGGAAGTGAATCTGATACCA          | AGAGATCCAATTGAGCGTCGTT      | 883                     | 884     | 900                      | 900     |
| Glucanase        | At1g09460     | At1g09460 | GTTGCACCGCTGTTGTCT               | CTTGCCACACACCAGCTT          | 885                     | 886     | 300                      | 900     |
| Apospory         | At4g25900     | At4g25900 | TCTTCAAATCCTCATTGGATGATC         | ACCACCTCCTTTGCCATCAC        | 887                     | 888     | 900                      | 900     |
| Unknown3         | At1g03420     | At1g03420 | TCCGGTGTCTCCATTTCCA              | TGCACTCCAGAACTTTCAAATCA     | 889                     | 890     | 300                      | 300     |
| FLA7             | FLA7          | At2g04780 | TTCGCTTTCGGAATTCAAGAA            | AAGGAGATTGACCACCAGCAAA      | 895                     | 896     | 300                      | 900     |
| FUS3             | FUS3          | At3g26790 | GGTACTGGCCAAACAACAATAGC          | CTAGCTGCAGACCATGAGCATT      | 897                     | 898     | 900                      | 900     |
| GASA1            | GASA1         | At1g75750 | TCCAACCTCGTCCAGGCTGAT            | GCACTCCACAATCGATCTTC        | 909                     | 910     | 300                      | 300     |
| HB1              | HB1           | At2g16060 | ACCAATTCCTGCTGAGCAAAA            | TGATTCACAACACATGACAAAAACA   | 911                     | 912     | 900                      | 300     |
| HSP17.6A         | HSP17.6A      | At5g12030 | CACCCGGATGCGTACGTT               | GGACCTGAATCTCATCTCCTTTGA    | 913                     | 914     | 300                      | 300     |
| AtWLIM2          | At2g39900     | At2g39900 | GGAAAGCCAGTGTTACCATAAATCTT       | AGAGCTGCATAGTTCGATGGAGATA   | 915                     | 916     | 900                      | 900     |
| atGRP3           | atGRP3        | At2g05520 | GGCATCTTCTGCCACAGTGAA            | CATTGTCACCGTAGCCACGTT       | 925                     | 926     | 900                      | 900     |
| Unknown1         | At1g62480     | At1g62480 | CCGTCTCCGAGTCTCTTCCA             | CGACCAAATCTTTAGTTGTTACTTCGA | 927                     | 928     | 900                      | 900     |
| WRKY             | At4g31550     | At4g31550 | CCACCGTCTAGTGTAACACTCGAT         | GCTCGGCCTCTTAGCTTT          | 929                     | 930     | 300                      | 300     |
| WUSCHEL          | WUSCHEL       | At2g17950 | AAGTATGGCCAATCGGAAGTTC           | CCGGCGTAAGAGCTAGTTCAGA      | 979                     | 980     | 900                      | 900     |
| AGL15            | AGL15         | AT5G13790 | AAAAGGAAAAGTAGGACCCAGAA          | AATTTTAGGGTTTTTTCATGATACC   | 975                     | 976     | 900                      | 900     |
| SERK1            | AtSERK1       | At1g71830 | TCTTGACAGCTGGGATCCT              | ACTGTTCTCGTTGTTGCAAGTGA     | 977                     | 978     | 900                      | 900     |



Table 5. Critical threshold values for Figure 1. “QPCR Group” refers to 96-well plate the reaction was carried out on. “Gene” and “AGI Code” indicates the gene analyzed and the corresponding AGI number. “Average CT” is average critical threshold of three measurements, and “STDEV CT” is the standard deviation associated with the average critical threshold. “Genotype”, “Tissue”, and “Growth Conditions” all refer to the sample analyzed, as also described in Figure 1 and associated text.

| QPCR Group | Gene    | AGI Code  | Average CT | STDEV CT | Genotype    | Tissue            | Growth Conditions                  |
|------------|---------|-----------|------------|----------|-------------|-------------------|------------------------------------|
| 1          | 18s     |           | 12.19      | 0.083    | Wt Columbia | Germinating seeds | MS+0.01% Methanol                  |
| 1          | 18s     |           | 11.69      | 0.128    | pk1         | Germinating seeds | MS+0.01% Methanol                  |
| 1          | 18s     |           | 12.06      | 0.026    | Wt Columbia | Germinating seeds | MS+ 10 <sup>-8</sup> M Uniconazole |
| 1          | 18s     |           | 11.20      | 0.074    | pk1         | Germinating seeds | MS+ 10 <sup>-8</sup> M Uniconazole |
| 2          | 18S     |           | 12.46      | 0.138    | Wt Columbia | Germinating seeds | MS+0.01% Methanol                  |
| 2          | 18S     |           | 11.81      | 0.198    | pk1         | Germinating seeds | MS+0.01% Methanol                  |
| 2          | 18S     |           | 11.98      | 0.150    | Wt Columbia | Germinating seeds | MS+ 10 <sup>-8</sup> M Uniconazole |
| 2          | 18S     |           | 11.21      | 0.168    | pk1         | Germinating seeds | MS+ 10 <sup>-8</sup> M Uniconazole |
| 3          | 18S     |           | 16.81      | 0.212    | pk1         | Germinating seeds | MS+0.01% Methanol                  |
| 3          | 18S     |           | 14.61      | 0.146    | pk1         | Germinating seeds | MS+ 10 <sup>-8</sup> M Uniconazole |
| 3          | 18S     |           | 17.56      | 0.079    | Wt Columbia | Germinating seeds | MS+0.01% Methanol                  |
| 3          | 18S     |           | 15.55      | 0.181    | Wt Columbia | Germinating seeds | MS+ 10 <sup>-8</sup> M Uniconazole |
| 2          | ABI3    | At3g24650 | 24.45      | 2.228    | Wt Columbia | Germinating seeds | MS+0.01% Methanol                  |
| 2          | ABI3    | At3g24650 | 25.97      | 0.570    | pk1         | Germinating seeds | MS+0.01% Methanol                  |
| 2          | ABI3    | At3g24650 | 25.33      | 0.088    | Wt Columbia | Germinating seeds | MS+ 10 <sup>-8</sup> M Uniconazole |
| 2          | ABI3    | At3g24650 | 24.64      | 0.134    | pk1         | Germinating seeds | MS+ 10 <sup>-8</sup> M Uniconazole |
| 3          | AGL15   | At5g13790 | 34.13      | 0.742    | pk1         | Germinating seeds | MS+0.01% Methanol                  |
| 3          | AGL15   | At5g13790 | 35.92      | 0.381    | pk1         | Germinating seeds | MS+ 10 <sup>-8</sup> M Uniconazole |
| 3          | AGL15   | At5g13790 | 34.97      | 1.798    | Wt Columbia | Germinating seeds | MS+0.01% Methanol                  |
| 3          | AGL15   | At5g13790 | 32.67      | 0.557    | Wt Columbia | Germinating seeds | MS+ 10 <sup>-8</sup> M Uniconazole |
| 3          | AtSERK1 | At1g71830 | 35.00      | 0.520    | pk1         | Germinating seeds | MS+0.01% Methanol                  |
| 3          | AtSERK1 | At1g71830 | 36.27      | 0.116    | pk1         | Germinating seeds | MS+ 10 <sup>-8</sup> M Uniconazole |
| 3          | AtSERK1 | At1g71830 | 35.58      | 0.925    | Wt Columbia | Germinating seeds | MS+0.01% Methanol                  |
| 3          | AtSERK1 | At1g71830 | 32.86      | 0.787    | Wt Columbia | Germinating seeds | MS+ 10 <sup>-8</sup> M Uniconazole |
| 2          | FUS3    | At3g26790 | 32.58      | 1.336    | Wt Columbia | Germinating seeds | MS+0.01% Methanol                  |
| 2          | FUS3    | At3g26790 | 32.48      | 1.598    | pk1         | Germinating seeds | MS+0.01% Methanol                  |
| 2          | FUS3    | At3g26790 | 32.11      | 1.015    | Wt Columbia | Germinating seeds | MS+ 10 <sup>-8</sup> M Uniconazole |
| 2          | FUS3    | At3g26790 | 30.20      | 0.153    | pk1         | Germinating seeds | MS+ 10 <sup>-8</sup> M Uniconazole |
| 1          | LEC1    | At1g21970 | 32.65      | 0.346    | Wt Columbia | Germinating seeds | MS+0.01% Methanol                  |
| 1          | LEC1    | At1g21970 | 33.38      | 0.434    | pk1         | Germinating seeds | MS+0.01% Methanol                  |
| 1          | LEC1    | At1g21970 | 30.05      | 0.448    | Wt Columbia | Germinating seeds | MS+ 10 <sup>-8</sup> M Uniconazole |
| 1          | LEC1    | At1g21970 | 29.30      | 0.286    | pk1         | Germinating seeds | MS+ 10 <sup>-8</sup> M Uniconazole |
| 1          | LEC2    | At1g28300 | 32.60      | 0.422    | Wt Columbia | Germinating seeds | MS+0.01% Methanol                  |
| 1          | LEC2    | At1g28300 | 32.79      | 0.451    | pk1         | Germinating seeds | MS+0.01% Methanol                  |
| 1          | LEC2    | At1g28300 | 29.38      | 0.280    | Wt Columbia | Germinating seeds | MS+ 10 <sup>-8</sup> M Uniconazole |
| 1          | LEC2    | At1g28300 | 28.48      | 0.256    | pk1         | Germinating seeds | MS+ 10 <sup>-8</sup> M Uniconazole |
| 3          | WUSCHEL | At2g17950 | 29.31      | 0.193    | pk1         | Germinating seeds | MS+0.01% Methanol                  |
| 3          | WUSCHEL | At2g17950 | 28.42      | 0.184    | pk1         | Germinating seeds | MS+ 10 <sup>-8</sup> M Uniconazole |
| 3          | WUSCHEL | At2g17950 | 30.48      | 0.416    | Wt Columbia | Germinating seeds | MS+0.01% Methanol                  |
| 3          | WUSCHEL | At2g17950 | 28.44      | 0.288    | Wt Columbia | Germinating seeds | MS+ 10 <sup>-8</sup> M Uniconazole |

Table 6. Critical threshold values for Figure 3. “QPCR Group” refers to 96-well plate the reaction was carried out on. “Gene” and “AGI Code” indicates the gene analyzed and the corresponding AGI number. “Average CT” is average critical threshold of three measurements, and “STDEV CT” is the standard deviation associated with the average critical threshold. “Genotype”, “Tissue”, and “Growth Conditions” all refer to the sample analyzed, as also described in Figure 3 and associated text.

| QPCR Group | Gene      | AGI Code  | Average CT | STDEV CT | Genotype    | Tissue            | Growth Conditions                  |
|------------|-----------|-----------|------------|----------|-------------|-------------------|------------------------------------|
| 4          | 18s       |           | 13.34      | 0.148    | pk1         | Germinating seeds | MS+ 10 <sup>-8</sup> M Uniconazole |
| 4          | 18s       |           | 15.25      | 0.126    | pk1         | Germinating seeds | MS+0.01% Methanol                  |
| 4          | 18s       |           | 14.44      | 0.568    | Wt Columbia | Germinating seeds | MS+ 10 <sup>-8</sup> M Uniconazole |
| 4          | 18s       |           | 16.17      | 0.029    | Wt Columbia | Germinating seeds | MS+0.01% Methanol                  |
| 5          | 18s       |           | 14.48      | 0.123    | pk1         | Germinating seeds | MS+ 10 <sup>-8</sup> M Uniconazole |
| 5          | 18s       |           | 16.37      | 0.098    | pk1         | Germinating seeds | MS+0.01% Methanol                  |
| 5          | 18s       |           | 15.57      | 0.132    | Wt Columbia | Germinating seeds | MS+ 10 <sup>-8</sup> M Uniconazole |
| 5          | 18s       |           | 17.34      | 0.029    | Wt Columbia | Germinating seeds | MS+0.01% Methanol                  |
| 6          | 18s       |           | 11.16      | 0.069    | pk1         | Germinating seeds | MS+ 10 <sup>-8</sup> M Uniconazole |
| 6          | 18s       |           | 12.09      | 0.091    | pk1         | Germinating seeds | MS+0.01% Methanol                  |
| 6          | 18s       |           | 11.71      | 0.089    | Wt Columbia | Germinating seeds | MS+ 10 <sup>-8</sup> M Uniconazole |
| 6          | 18s       |           | 12.28      | 0.155    | Wt Columbia | Germinating seeds | MS+0.01% Methanol                  |
| 7          | 18S       |           | 11.21      | 0.168    | pk1         | Germinating seeds | MS+ 10 <sup>-8</sup> M Uniconazole |
| 7          | 18S       |           | 11.81      | 0.198    | pk1         | Germinating seeds | MS+0.01% Methanol                  |
| 7          | 18S       |           | 11.98      | 0.150    | Wt Columbia | Germinating seeds | MS+ 10 <sup>-8</sup> M Uniconazole |
| 7          | 18S       |           | 12.46      | 0.138    | Wt Columbia | Germinating seeds | MS+0.01% Methanol                  |
| 5          | Apospory  | At4g25900 | 27.65      | 0.086    | pk1         | Germinating seeds | MS+ 10 <sup>-8</sup> M Uniconazole |
| 5          | Apospory  | At4g25900 | 28.84      | 0.212    | pk1         | Germinating seeds | MS+0.01% Methanol                  |
| 5          | Apospory  | At4g25900 | 30.51      | 0.271    | Wt Columbia | Germinating seeds | MS+ 10 <sup>-8</sup> M Uniconazole |
| 5          | Apospory  | At4g25900 | 32.35      | 0.336    | Wt Columbia | Germinating seeds | MS+0.01% Methanol                  |
| 7          | atGRP3    | At2g05520 | 26.75      | 0.037    | pk1         | Germinating seeds | MS+ 10 <sup>-8</sup> M Uniconazole |
| 7          | atGRP3    | At2g05520 | 26.40      | 0.196    | pk1         | Germinating seeds | MS+0.01% Methanol                  |
| 7          | atGRP3    | At2g05520 | 29.47      | 0.514    | Wt Columbia | Germinating seeds | MS+ 10 <sup>-8</sup> M Uniconazole |
| 7          | atGRP3    | At2g05520 | 30.19      | 0.021    | Wt Columbia | Germinating seeds | MS+0.01% Methanol                  |
| 6          | AtWLM2    | At2g39900 | 26.97      | 0.151    | pk1         | Germinating seeds | MS+ 10 <sup>-8</sup> M Uniconazole |
| 6          | AtWLM2    | At2g39900 | 27.30      | 0.166    | pk1         | Germinating seeds | MS+0.01% Methanol                  |
| 6          | AtWLM2    | At2g39900 | 29.17      | 0.204    | Wt Columbia | Germinating seeds | MS+ 10 <sup>-8</sup> M Uniconazole |
| 6          | AtWLM2    | At2g39900 | 29.34      | 0.122    | Wt Columbia | Germinating seeds | MS+0.01% Methanol                  |
| 5          | FLA7      | At2g04780 | 28.88      | 0.122    | pk1         | Germinating seeds | MS+ 10 <sup>-8</sup> M Uniconazole |
| 5          | FLA7      | At2g04780 | 31.08      | 0.609    | pk1         | Germinating seeds | MS+0.01% Methanol                  |
| 5          | FLA7      | At2g04780 | 30.91      | 0.636    | Wt Columbia | Germinating seeds | MS+ 10 <sup>-8</sup> M Uniconazole |
| 5          | FLA7      | At2g04780 | 32.83      | 0.833    | Wt Columbia | Germinating seeds | MS+0.01% Methanol                  |
| 6          | GASA1     | At1g75750 | 25.80      | 0.208    | pk1         | Germinating seeds | MS+ 10 <sup>-8</sup> M Uniconazole |
| 6          | GASA1     | At1g75750 | 25.65      | 0.162    | pk1         | Germinating seeds | MS+0.01% Methanol                  |
| 6          | GASA1     | At1g75750 | 28.96      | 0.127    | Wt Columbia | Germinating seeds | MS+ 10 <sup>-8</sup> M Uniconazole |
| 6          | GASA1     | At1g75750 | 29.72      | 0.417    | Wt Columbia | Germinating seeds | MS+0.01% Methanol                  |
| 5          | Glucanase | At1g09460 | 29.39      | 0.210    | pk1         | Germinating seeds | MS+ 10 <sup>-8</sup> M Uniconazole |
| 5          | Glucanase | At1g09460 | 31.03      | 0.192    | pk1         | Germinating seeds | MS+0.01% Methanol                  |
| 5          | Glucanase | At1g09460 | 31.33      | 0.353    | Wt Columbia | Germinating seeds | MS+ 10 <sup>-8</sup> M Uniconazole |
| 5          | Glucanase | At1g09460 | 32.79      | 0.442    | Wt Columbia | Germinating seeds | MS+0.01% Methanol                  |
| 4          | HB1       | At2g16060 | 26.20      | 0.122    | pk1         | Germinating seeds | MS+ 10 <sup>-8</sup> M Uniconazole |
| 4          | HB1       | At2g16060 | 27.93      | 0.722    | pk1         | Germinating seeds | MS+0.01% Methanol                  |
| 4          | HB1       | At2g16060 | 28.86      | 0.339    | Wt Columbia | Germinating seeds | MS+ 10 <sup>-8</sup> M Uniconazole |
| 4          | HB1       | At2g16060 | 29.97      | 0.178    | Wt Columbia | Germinating seeds | MS+0.01% Methanol                  |
| 4          | HSP17.6A  | At5g12030 | 27.02      | 0.136    | pk1         | Germinating seeds | MS+ 10 <sup>-8</sup> M Uniconazole |
| 4          | HSP17.6A  | At5g12030 | 27.92      | 0.226    | pk1         | Germinating seeds | MS+0.01% Methanol                  |
| 4          | HSP17.6A  | At5g12030 | 29.56      | 0.321    | Wt Columbia | Germinating seeds | MS+ 10 <sup>-8</sup> M Uniconazole |
| 4          | HSP17.6A  | At5g12030 | 31.27      | 0.917    | Wt Columbia | Germinating seeds | MS+0.01% Methanol                  |
| 4          | Unknown1  | At1g62480 | 25.80      | 0.314    | pk1         | Germinating seeds | MS+ 10 <sup>-8</sup> M Uniconazole |
| 4          | Unknown1  | At1g62480 | 27.24      | 0.167    | pk1         | Germinating seeds | MS+0.01% Methanol                  |
| 4          | Unknown1  | At1g62480 | 28.73      | 0.386    | Wt Columbia | Germinating seeds | MS+ 10 <sup>-8</sup> M Uniconazole |
| 4          | Unknown1  | At1g62480 | 30.92      | 0.731    | Wt Columbia | Germinating seeds | MS+0.01% Methanol                  |
| 5          | Unknown2  | At2g35810 | 28.32      | 0.068    | pk1         | Germinating seeds | MS+ 10 <sup>-8</sup> M Uniconazole |
| 5          | Unknown2  | At2g35810 | 30.22      | 0.341    | pk1         | Germinating seeds | MS+0.01% Methanol                  |
| 5          | Unknown2  | At2g35810 | 30.93      | 0.354    | Wt Columbia | Germinating seeds | MS+ 10 <sup>-8</sup> M Uniconazole |
| 5          | Unknown2  | At2g35810 | 33.27      | 0.415    | Wt Columbia | Germinating seeds | MS+0.01% Methanol                  |
| 5          | Unknown3  | At1g03420 | 29.71      | 0.302    | pk1         | Germinating seeds | MS+ 10 <sup>-8</sup> M Uniconazole |
| 5          | Unknown3  | At1g03420 | 31.36      | 0.103    | pk1         | Germinating seeds | MS+0.01% Methanol                  |
| 5          | Unknown3  | At1g03420 | 29.94      | 0.125    | Wt Columbia | Germinating seeds | MS+ 10 <sup>-8</sup> M Uniconazole |
| 5          | Unknown3  | At1g03420 | 32.03      | 0.362    | Wt Columbia | Germinating seeds | MS+0.01% Methanol                  |
| 4          | WRKY      | At4g31550 | 26.41      | 0.089    | pk1         | Germinating seeds | MS+ 10 <sup>-8</sup> M Uniconazole |
| 4          | WRKY      | At4g31550 | 27.88      | 0.377    | pk1         | Germinating seeds | MS+0.01% Methanol                  |
| 4          | WRKY      | At4g31550 | 27.62      | 0.109    | Wt Columbia | Germinating seeds | MS+ 10 <sup>-8</sup> M Uniconazole |
| 4          | WRKY      | At4g31550 | 29.21      | 0.312    | Wt Columbia | Germinating seeds | MS+0.01% Methanol                  |

Table 7. Critical threshold values for Figure 4. “QPCR Group” refers to 96-well plate the reaction was carried out on. “Gene” and “AGI Code” indicates the gene analyzed and the corresponding AGI number. “Average CT” is average critical threshold of three measurements, and “STDEV CT” is the standard deviation associated with the average critical threshold. “Genotype”, “Tissue”, and “Growth Conditions” all refer to the sample analyzed, as also described in Figure 4 and associated text.

| QPCR Group | Gene     | AGI Code  | Average CT | STDEV CT | Genotype    | Tissue   | Growth Conditions         |
|------------|----------|-----------|------------|----------|-------------|----------|---------------------------|
| 8          | 18S      |           | 12.82      | 0.127    | Wt Columbia | Leaves   | 32 day old plants in soil |
| 9          | 18S      |           | 12.73      | 0.006    | Wt Columbia | Leaves   | 32 day old plants in soil |
| 8          | Apospory | At4g25900 | 27.15      | 0.142    | Wt Columbia | Leaves   | 32 day old plants in soil |
| 8          | atGRP3   | At2g05520 | 21.40      | 0.105    | Wt Columbia | Leaves   | 32 day old plants in soil |
| 8          | AtWLIM2  | At2g39900 | 29.85      | 0.275    | Wt Columbia | Leaves   | 32 day old plants in soil |
| 8          | FUS3     | At3g26790 | 37.57      | 1.688    | Wt Columbia | Leaves   | 32 day old plants in soil |
| 8          | GASA1    | At1g75750 | 26.13      | 0.078    | Wt Columbia | Leaves   | 32 day old plants in soil |
| 9          | HSP17.6A | At5g12030 | 34.88      | 0.297    | Wt Columbia | Leaves   | 32 day old plants in soil |
| 8          | Unknown1 | At1g62480 | 29.18      | 0.136    | Wt Columbia | Leaves   | 32 day old plants in soil |
| 8          | Unknown2 | At2g35810 | 29.09      | 0.129    | Wt Columbia | Leaves   | 32 day old plants in soil |
| 10         | 18S      |           | 13.71      | 0.133    | Wt Columbia | Roots    | 32 day old plants in soil |
| 11         | 18S      |           | 11.32      | 0.026    | Wt Columbia | Roots    | 32 day old plants in soil |
| 10         | Apospory | At4g25900 | 27.31      | 0.789    | Wt Columbia | Roots    | 32 day old plants in soil |
| 10         | atGRP3   | At2g05520 | 28.41      | 0.168    | Wt Columbia | Roots    | 32 day old plants in soil |
| 10         | AtWLIM2  | At2g39900 | 31.05      | 0.176    | Wt Columbia | Roots    | 32 day old plants in soil |
| 10         | FUS3     | At3g26790 | 38.38      | 1.867    | Wt Columbia | Roots    | 32 day old plants in soil |
| 10         | GASA1    | At1g75750 | 26.17      | 0.061    | Wt Columbia | Roots    | 32 day old plants in soil |
| 11         | HSP17.6A | At5g12030 | 29.96      | 0.299    | Wt Columbia | Roots    | 32 day old plants in soil |
| 10         | Unknown1 | At1g62480 | 25.29      | 0.038    | Wt Columbia | Roots    | 32 day old plants in soil |
| 10         | Unknown2 | At2g35810 | 29.59      | 0.136    | Wt Columbia | Roots    | 32 day old plants in soil |
| 12         | 18s      |           | 11.90      | 0.106    | Wt Columbia | Siliques | 32 day old plants in soil |
| 13         | 18s      |           | 12.87      | 0.221    | Wt Columbia | Siliques | 32 day old plants in soil |
| 14         | 18s      |           | 12.79      | 0.137    | Wt Columbia | Siliques | 32 day old plants in soil |
| 15         | 18s      |           | 12.82      | 0.104    | Wt Columbia | Siliques | 32 day old plants in soil |
| 15         | Apospory | At4g25900 | 27.25      | 0.148    | Wt Columbia | Siliques | 32 day old plants in soil |
| 14         | atGRP3   | At2g05520 | 26.20      | 0.300    | Wt Columbia | Siliques | 32 day old plants in soil |
| 15         | AtWLIM2  | At2g39900 | 27.49      | 0.242    | Wt Columbia | Siliques | 32 day old plants in soil |
| 13         | FUS3     | At3g26790 | 34.98      | 0.690    | Wt Columbia | Siliques | 32 day old plants in soil |
| 14         | GAST1    | At1g75750 | 24.66      | 0.064    | Wt Columbia | Siliques | 32 day old plants in soil |
| 15         | HSP17.6A | At5g12030 | 34.75      | 0.764    | Wt Columbia | Siliques | 32 day old plants in soil |
| 15         | Unknown1 | At1g62480 | 24.65      | 0.068    | Wt Columbia | Siliques | 32 day old plants in soil |
| 12         | Unknown2 | At2g35810 | 28.16      | 0.112    | Wt Columbia | Siliques | 32 day old plants in soil |

Table 8. Critical threshold values for Figure 5. “QPCR Group” refers to 96-well plate the reaction was carried out on. “Gene” and “AGI Code” indicates the gene analyzed and the corresponding AGI number. “Average CT” is average critical threshold of three measurements, and “STDEV CT” is the standard deviation associated with the average critical threshold. “Genotype”, “Tissue”, and “Growth Conditions” all refer to the sample analyzed, as also described in Figure 5 and associated text.

| QPCR Group | Gene     | AGI Code  | Average CT | STDEV CT | Genotype    | Tissue | Growth Conditions                     |
|------------|----------|-----------|------------|----------|-------------|--------|---------------------------------------|
| 17         | 18s      |           | 12.58      | 0.134    | Wt Columbia | Roots  | 3wk on MS+Cytokinin after 4d on MS+U8 |
| 17         | 18s      |           | 14.17      | 0.087    | <i>pkl</i>  | Roots  | 3wk on MS+Cytokinin after 4d on MS+U8 |
| 18         | 18s      |           | 12.77      | 0.225    | Wt Columbia | Roots  | 3wk on MS+Cytokinin after 4d on MS+U8 |
| 18         | 18s      |           | 14.28      | 0.148    | <i>pkl</i>  | Roots  | 3wk on MS+Cytokinin after 4d on MS+U8 |
| 19         | 18s      |           | 12.83      | 0.172    | Wt Columbia | Roots  | 3wk on MS+Cytokinin after 4d on MS+U8 |
| 19         | 18s      |           | 14.36      | 0.067    | <i>pkl</i>  | Roots  | 3wk on MS+Cytokinin after 4d on MS+U8 |
| 20         | 18s      |           | 13.05      | 0.103    | Wt Columbia | Roots  | 3wk on MS+Cytokinin after 4d on MS+U8 |
| 20         | 18s      |           | 14.33      | 0.057    | <i>pkl</i>  | Roots  | 3wk on MS+Cytokinin after 4d on MS+U8 |
| 21         | 18s      |           | 10.64      | 0.038    | Wt Columbia | Roots  | 3wk on MS+Cytokinin after 4d on MS+U8 |
| 21         | 18s      |           | 12.24      | 0.058    | <i>pkl</i>  | Roots  | 3wk on MS+Cytokinin after 4d on MS+U8 |
| 20         | Apospory | At4g25900 | 24.88      | 0.076    | Wt Columbia | Roots  | 3wk on MS+Cytokinin after 4d on MS+U8 |
| 20         | Apospory | At4g25900 | 26.16      | 0.026    | <i>pkl</i>  | Roots  | 3wk on MS+Cytokinin after 4d on MS+U8 |
| 19         | atGRP3   | At2g05520 | 28.55      | 0.454    | Wt Columbia | Roots  | 3wk on MS+Cytokinin after 4d on MS+U8 |
| 19         | atGRP3   | At2g05520 | 27.05      | 0.197    | <i>pkl</i>  | Roots  | 3wk on MS+Cytokinin after 4d on MS+U8 |
| 20         | AtWLIM2  | At2g39900 | 27.02      | 0.284    | Wt Columbia | Roots  | 3wk on MS+Cytokinin after 4d on MS+U8 |
| 20         | AtWLIM2  | At2g39900 | 29.59      | 0.307    | <i>pkl</i>  | Roots  | 3wk on MS+Cytokinin after 4d on MS+U8 |
| 18         | FUS3     | At3g26790 | 37.43      | 3.106    | Wt Columbia | Roots  | 3wk on MS+Cytokinin after 4d on MS+U8 |
| 18         | FUS3     | At3g26790 | 28.10      | 0.079    | <i>pkl</i>  | Roots  | 3wk on MS+Cytokinin after 4d on MS+U8 |
| 19         | GASA1    | At1g75750 | 23.75      | 0.093    | Wt Columbia | Roots  | 3wk on MS+Cytokinin after 4d on MS+U8 |
| 19         | GASA1    | At1g75750 | 26.63      | 0.070    | <i>pkl</i>  | Roots  | 3wk on MS+Cytokinin after 4d on MS+U8 |
| 20         | HSP17.6A | At5g12030 | 33.75      | 0.744    | Wt Columbia | Roots  | 3wk on MS+Cytokinin after 4d on MS+U8 |
| 20         | HSP17.6A | At5g12030 | 31.46      | 0.650    | <i>pkl</i>  | Roots  | 3wk on MS+Cytokinin after 4d on MS+U8 |
| 17         | LEC1     | At1g21970 | 36.85      | 2.841    | Wt Columbia | Roots  | 3wk on MS+Cytokinin after 4d on MS+U8 |
| 17         | LEC1     | At1g21970 | 29.68      | 0.244    | <i>pkl</i>  | Roots  | 3wk on MS+Cytokinin after 4d on MS+U8 |
| 21         | LEC2     | At1g28300 | 38.20      | 1.260    | Wt Columbia | Roots  | 3wk on MS+Cytokinin after 4d on MS+U8 |
| 21         | LEC2     | At1g28300 | 29.70      | 0.506    | <i>pkl</i>  | Roots  | 3wk on MS+Cytokinin after 4d on MS+U8 |
| 20         | Unknown1 | At1g62480 | 24.46      | 0.082    | Wt Columbia | Roots  | 3wk on MS+Cytokinin after 4d on MS+U8 |
| 20         | Unknown1 | At1g62480 | 26.27      | 0.099    | <i>pkl</i>  | Roots  | 3wk on MS+Cytokinin after 4d on MS+U8 |
| 17         | Unknown2 | At2g35810 | 25.45      | 0.171    | Wt Columbia | Roots  | 3wk on MS+Cytokinin after 4d on MS+U8 |
| 17         | Unknown2 | At2g35810 | 28.27      | 0.180    | <i>pkl</i>  | Roots  | 3wk on MS+Cytokinin after 4d on MS+U8 |

Table 9. Critical threshold values for Figure 6. “QPCR Group” refers to 96-well plate the reaction was carried out on. “Gene” and “AGI Code” indicates the gene analyzed and the corresponding AGI number. “Average CT” is average critical threshold of three measurements, and “STDEV CT” is the standard deviation associated with the average critical threshold. “Genotype”, “Tissue”, and “Growth Conditions” all refer to the sample analyzed, as also described in Figure 6 and associated text.

| QPCR Group | Gene     | AGI Code  | Average CT | STDEV CT | Genotype    | Tissue | Growth Conditions         |
|------------|----------|-----------|------------|----------|-------------|--------|---------------------------|
| 22         | 18S      |           | 12.82      | 0.127    | Wt Columbia | Leaves | 32 day old plants in soil |
| 22         | 18S      |           | 12.93      | 0.137    | pkl         | Leaves | 32 day old plants in soil |
| 23         | 18S      |           | 12.73      | 0.006    | Wt Columbia | Leaves | 32 day old plants in soil |
| 23         | 18S      |           | 13.20      | 0.070    | pkl         | Leaves | 32 day old plants in soil |
| 22         | Apospory | At4g25900 | 27.15      | 0.142    | Wt Columbia | Leaves | 32 day old plants in soil |
| 22         | Apospory | At4g25900 | 26.82      | 0.160    | pkl         | Leaves | 32 day old plants in soil |
| 22         | atGRP3   | At2g05520 | 21.40      | 0.105    | Wt Columbia | Leaves | 32 day old plants in soil |
| 22         | atGRP3   | At2g05520 | 21.81      | 0.177    | pkl         | Leaves | 32 day old plants in soil |
| 22         | AtWLIM2  | At2g39900 | 29.85      | 0.275    | Wt Columbia | Leaves | 32 day old plants in soil |
| 22         | AtWLIM2  | At2g39900 | 29.23      | 0.175    | pkl         | Leaves | 32 day old plants in soil |
| 22         | FUS3     | At3g26790 | 37.57      | 1.688    | Wt Columbia | Leaves | 32 day old plants in soil |
| 22         | FUS3     | At3g26790 | 35.11      | 0.919    | pkl         | Leaves | 32 day old plants in soil |
| 22         | GASA1    | At1g75750 | 26.13      | 0.078    | Wt Columbia | Leaves | 32 day old plants in soil |
| 22         | GASA1    | At1g75750 | 24.20      | 0.386    | pkl         | Leaves | 32 day old plants in soil |
| 23         | HSP17.6A | At5g12030 | 34.88      | 0.297    | Wt Columbia | Leaves | 32 day old plants in soil |
| 23         | HSP17.6A | At5g12030 | 37.96      | 0.431    | pkl         | Leaves | 32 day old plants in soil |
| 22         | LEC2     | At1g28300 | 34.57      | 0.494    | Wt Columbia | Leaves | 32 day old plants in soil |
| 22         | LEC2     | At1g28300 | 34.58      | 1.092    | pkl         | Leaves | 32 day old plants in soil |
| 22         | Unknown1 | At1g62480 | 29.18      | 0.136    | Wt Columbia | Leaves | 32 day old plants in soil |
| 22         | Unknown1 | At1g62480 | 27.72      | 0.135    | pkl         | Leaves | 32 day old plants in soil |
| 22         | Unknown2 | At2g35810 | 29.09      | 0.129    | Wt Columbia | Leaves | 32 day old plants in soil |
| 22         | Unknown2 | At2g35810 | 28.47      | 0.159    | pkl         | Leaves | 32 day old plants in soil |

Table 10. Critical threshold values for Figure 7. “QPCR Group” refers to 96-well plate the reaction was carried out on. “Gene” and “AGI Code” indicates the gene analyzed and the corresponding AGI number. “Average CT” is average critical threshold of three measurements, and “STDEV CT” is the standard deviation associated with the average critical threshold. “Genotype”, “Tissue”, and “Growth Conditions” all refer to the sample analyzed, as also described in Figure 7 and associated text.

| QPCR Group | Gene     | AGI Code  | Average CT | STDEV CT | Genotype    | Tissue                 | Growth Conditions |
|------------|----------|-----------|------------|----------|-------------|------------------------|-------------------|
| 24         | 18S      |           | 19.37      | 0.112    | Wt Columbia | 12 h Germinating seeds | MS+0.01% Methanol |
| 25         | 18S      |           | 15.65      | 0.157    | pk1         | 12 h Germinating seeds | MS+0.01% Methanol |
| 26         | 18S      |           | 20.68      | 0.078    | Wt Columbia | 24 h Germinating seeds | MS+0.01% Methanol |
| 27         | 18S      |           | 15.24      | 0.051    | pk1         | 24 h Germinating seeds | MS+0.01% Methanol |
| 28         | 18S      |           | 12.46      | 0.083    | Wt Columbia | 36 h Germinating seeds | MS+0.01% Methanol |
| 29         | 18S      |           | 12.22      | 0.066    | pk1         | 36 h Germinating seeds | MS+0.01% Methanol |
| 30         | 18S      |           | 25.36      | 0.272    | Wt Columbia | 12 h Germinating seeds | MS+0.01% Methanol |
| 31         | 18S      |           | 17.67      | 0.107    | pk1         | 12 h Germinating seeds | MS+0.01% Methanol |
| 32         | 18S      |           | 25.10      | 0.115    | Wt Columbia | 24 h Germinating seeds | MS+0.01% Methanol |
| 33         | 18S      |           | 17.04      | 0.080    | pk1         | 24 h Germinating seeds | MS+0.01% Methanol |
| 34         | 18S      |           | 14.21      | 0.026    | Wt Columbia | 36 h Germinating seeds | MS+0.01% Methanol |
| 35         | 18S      |           | 15.54      | 0.055    | pk1         | 36 h Germinating seeds | MS+0.01% Methanol |
| 24         | Apospory | At4g25900 | 35.55      | 0.243    | Wt Columbia | 12 h Germinating seeds | MS+0.01% Methanol |
| 25         | Apospory | At4g25900 | 33.55      | 0.349    | pk1         | 12 h Germinating seeds | MS+0.01% Methanol |
| 26         | Apospory | At4g25900 | 34.62      | 1.147    | Wt Columbia | 24 h Germinating seeds | MS+0.01% Methanol |
| 27         | Apospory | At4g25900 | 30.01      | 0.140    | pk1         | 24 h Germinating seeds | MS+0.01% Methanol |
| 28         | Apospory | At4g25900 | 28.18      | 0.315    | Wt Columbia | 36 h Germinating seeds | MS+0.01% Methanol |
| 29         | Apospory | At4g25900 | 26.17      | 0.131    | pk1         | 36 h Germinating seeds | MS+0.01% Methanol |
| 24         | atGRP3   | At2g05520 | 37.30      | 1.119    | Wt Columbia | 12 h Germinating seeds | MS+0.01% Methanol |
| 25         | atGRP3   | At2g05520 | 35.96      | 0.860    | pk1         | 12 h Germinating seeds | MS+0.01% Methanol |
| 26         | atGRP3   | At2g05520 | 34.28      | 0.121    | Wt Columbia | 24 h Germinating seeds | MS+0.01% Methanol |
| 27         | atGRP3   | At2g05520 | 31.94      | 0.122    | pk1         | 24 h Germinating seeds | MS+0.01% Methanol |
| 28         | atGRP3   | At2g05520 | 27.83      | 0.196    | Wt Columbia | 36 h Germinating seeds | MS+0.01% Methanol |
| 29         | atGRP3   | At2g05520 | 27.94      | 0.080    | pk1         | 36 h Germinating seeds | MS+0.01% Methanol |
| 24         | AtWLMIM2 | At2g39900 | 38.56      | 2.494    | Wt Columbia | 12 h Germinating seeds | MS+0.01% Methanol |
| 25         | AtWLMIM2 | At2g39900 | 35.71      | 0.751    | pk1         | 12 h Germinating seeds | MS+0.01% Methanol |
| 26         | AtWLMIM2 | At2g39900 | 36.34      | 1.089    | Wt Columbia | 24 h Germinating seeds | MS+0.01% Methanol |
| 27         | AtWLMIM2 | At2g39900 | 32.16      | 0.186    | pk1         | 24 h Germinating seeds | MS+0.01% Methanol |
| 28         | AtWLMIM2 | At2g39900 | 29.43      | 0.167    | Wt Columbia | 36 h Germinating seeds | MS+0.01% Methanol |
| 29         | AtWLMIM2 | At2g39900 | 28.32      | 0.262    | pk1         | 36 h Germinating seeds | MS+0.01% Methanol |
| 24         | FUS3     | At3g26790 | 38.87      | 1.249    | Wt Columbia | 12 h Germinating seeds | MS+0.01% Methanol |
| 25         | FUS3     | At3g26790 | 35.23      | 0.433    | pk1         | 12 h Germinating seeds | MS+0.01% Methanol |
| 26         | FUS3     | At3g26790 | 39.33      | 1.155    | Wt Columbia | 24 h Germinating seeds | MS+0.01% Methanol |
| 27         | FUS3     | At3g26790 | 35.62      | 1.730    | pk1         | 24 h Germinating seeds | MS+0.01% Methanol |
| 28         | FUS3     | At3g26790 | 35.22      | 0.697    | Wt Columbia | 36 h Germinating seeds | MS+0.01% Methanol |
| 29         | FUS3     | At3g26790 | 33.10      | 0.269    | pk1         | 36 h Germinating seeds | MS+0.01% Methanol |
| 24         | GASA1    | At1g75750 | 39.00      | 1.726    | Wt Columbia | 12 h Germinating seeds | MS+0.01% Methanol |
| 25         | GASA1    | At1g75750 | 34.49      | 1.397    | pk1         | 12 h Germinating seeds | MS+0.01% Methanol |
| 26         | GASA1    | At1g75750 | 37.67      | 2.022    | Wt Columbia | 24 h Germinating seeds | MS+0.01% Methanol |
| 27         | GASA1    | At1g75750 | 32.47      | 0.553    | pk1         | 24 h Germinating seeds | MS+0.01% Methanol |
| 28         | GASA1    | At1g75750 | 28.38      | 0.121    | Wt Columbia | 36 h Germinating seeds | MS+0.01% Methanol |
| 29         | GASA1    | At1g75750 | 25.05      | 0.032    | pk1         | 36 h Germinating seeds | MS+0.01% Methanol |
| 30         | HSP17.6A | At5g12030 | 33.00      | 0.110    | Wt Columbia | 12 h Germinating seeds | MS+0.01% Methanol |
| 31         | HSP17.6A | At5g12030 | 26.68      | 0.241    | pk1         | 12 h Germinating seeds | MS+0.01% Methanol |
| 32         | HSP17.6A | At5g12030 | 35.20      | 0.014    | Wt Columbia | 24 h Germinating seeds | MS+0.01% Methanol |
| 33         | HSP17.6A | At5g12030 | 29.31      | 0.159    | pk1         | 24 h Germinating seeds | MS+0.01% Methanol |
| 34         | HSP17.6A | At5g12030 | 29.88      | 0.169    | Wt Columbia | 36 h Germinating seeds | MS+0.01% Methanol |
| 35         | HSP17.6A | At5g12030 | 28.22      | 0.274    | pk1         | 36 h Germinating seeds | MS+0.01% Methanol |
| 24         | LEC1     | At1g21970 | 35.10      | 0.232    | Wt Columbia | 12 h Germinating seeds | MS+0.01% Methanol |
| 25         | LEC1     | At1g21970 | 34.71      | 0.864    | pk1         | 12 h Germinating seeds | MS+0.01% Methanol |
| 26         | LEC1     | At1g21970 | 37.16      | 2.576    | Wt Columbia | 24 h Germinating seeds | MS+0.01% Methanol |
| 27         | LEC1     | At1g21970 | 32.67      | 0.260    | pk1         | 24 h Germinating seeds | MS+0.01% Methanol |
| 28         | LEC1     | At1g21970 | 34.70      | 0.386    | Wt Columbia | 36 h Germinating seeds | MS+0.01% Methanol |
| 29         | LEC1     | At1g21970 | 30.59      | 0.095    | pk1         | 36 h Germinating seeds | MS+0.01% Methanol |
| 24         | LEC2     | At1g28300 | 40.00      | 0.000    | Wt Columbia | 12 h Germinating seeds | MS+0.01% Methanol |
| 25         | LEC2     | At1g28300 | 34.04      | 0.502    | pk1         | 12 h Germinating seeds | MS+0.01% Methanol |
| 26         | LEC2     | At1g28300 | 38.92      | 1.871    | Wt Columbia | 24 h Germinating seeds | MS+0.01% Methanol |
| 27         | LEC2     | At1g28300 | 31.59      | 0.370    | pk1         | 24 h Germinating seeds | MS+0.01% Methanol |
| 28         | LEC2     | At1g28300 | 32.81      | 0.403    | Wt Columbia | 36 h Germinating seeds | MS+0.01% Methanol |
| 29         | LEC2     | At1g28300 | 29.79      | 0.085    | pk1         | 36 h Germinating seeds | MS+0.01% Methanol |
| 24         | Unknown1 | At1g62480 | 37.27      | 0.877    | Wt Columbia | 12 h Germinating seeds | MS+0.01% Methanol |
| 25         | Unknown1 | At1g62480 | 34.47      | 0.260    | pk1         | 12 h Germinating seeds | MS+0.01% Methanol |
| 26         | Unknown1 | At1g62480 | 36.81      | 1.702    | Wt Columbia | 24 h Germinating seeds | MS+0.01% Methanol |
| 27         | Unknown1 | At1g62480 | 30.76      | 0.262    | pk1         | 24 h Germinating seeds | MS+0.01% Methanol |
| 28         | Unknown1 | At1g62480 | 28.26      | 0.156    | Wt Columbia | 36 h Germinating seeds | MS+0.01% Methanol |
| 29         | Unknown1 | At1g62480 | 26.31      | 0.061    | pk1         | 36 h Germinating seeds | MS+0.01% Methanol |
| 24         | Unknown2 | At2g35810 | 36.35      | 0.638    | Wt Columbia | 12 h Germinating seeds | MS+0.01% Methanol |
| 25         | Unknown2 | At2g35810 | 33.80      | 0.390    | pk1         | 12 h Germinating seeds | MS+0.01% Methanol |
| 26         | Unknown2 | At2g35810 | 35.17      | 0.241    | Wt Columbia | 24 h Germinating seeds | MS+0.01% Methanol |
| 27         | Unknown2 | At2g35810 | 31.21      | 0.257    | pk1         | 24 h Germinating seeds | MS+0.01% Methanol |
| 28         | Unknown2 | At2g35810 | 29.22      | 0.151    | Wt Columbia | 36 h Germinating seeds | MS+0.01% Methanol |
| 29         | Unknown2 | At2g35810 | 27.53      | 0.150    | pk1         | 36 h Germinating seeds | MS+0.01% Methanol |
